# Supplementary material for: Synthesis and evaluation of thieno[2,3-d]pyrimidin-4(3H)-ones as potential antitubercular agents
Source: Royal Society of Chemistry journal article supplement (doi:10.1039/c5md00404g), 2015-01-01
Supplement: c5md00404g1.pdf [file c5md00404g1.pdf]

## Supplementary information

### Synthesis and evaluation of thieno[2,3-*d*]pyrimidin-4(3*H*)-ones as potential anti-tubercular agents

Hanumant B. Borate<sup>a,\*</sup>, Ritesh A. Annadate<sup>a</sup>, Sandip S. Vagh<sup>a</sup>, Mahesh M. Pisal<sup>a</sup>, Sagar B. Deokate<sup>a</sup>, Manisha A. Arkile,<sup>b</sup> Nandadeep J. Jadhav<sup>b</sup>, Dhiman Sarkar<sup>b</sup>

<sup>a</sup>Division of Organic Chemistry, CSIR-National Chemical Laboratory,

Dr. Homi Bhabha Road, Pune 411 008, India

<sup>b</sup>Combichem Bio-resource Centre, CSIR-National Chemical Laboratory,

Dr. Homi Bhabha Road, Pune 411 008, India

All the solvents and reagents were purchased from commercial suppliers and were used without further purification. The progress of each reaction was monitored by ascending thin layer chromatography (TLC) using TLC aluminum sheets, silica gel F254 precoated (Merck, Germany), and locating the spots using UV light or iodine vapors as the visualizing agent. Melting points were obtained by an open capillary method and are uncorrected. <sup>1</sup>H NMR spectra were recorded (CDCl<sub>3</sub>/DMSO-*d*<sub>6</sub>) on a Bruker Avance 200 NMR spectrometer or JEOL ECX 400 NMR spectrometer or Bruker 500 NMR spectrometer. <sup>13</sup>C NMR and DEPT 135 spectra were recorded (CDCl<sub>3</sub>/DMSO-*d*<sub>6</sub>) on Bruker Avance 200 NMR spectrometer or JEOL ECX 400 NMR spectrometer. Chemical shifts (δ) are reported in parts per million (ppm) using tetramethylsilane (TMS) as an internal standard. The splitting pattern abbreviations are designated as singlet (s), doublet (d), double doublet (dd), triplet (t), quartet (q) and multiplet (m). The mass spectra were recorded on a Q-TOF micromass (YA-105) spectrometer in ESI (electrospray ionization) mode.

#### Preparation of 6-ethyl-3-pentylthieno[2,3-*d*]pyrimidin-4(3*H*)-one (**11g**)

Potassium carbonate (3.44 g, 0.025 mol) was taken in a 100 mL two-necked RB flask and heated under vacuum to remove the traces of moisture and flushed with nitrogen. 6-Ethylthieno[2,3-*d*]pyrimidin-4(3*H*)-one (1.5 g, 0.008 mol) was added under nitrogen followed by dry DMF (25 mL) and stirred for 10 min. Pentyl bromide (1.55 ml, 1.88 g, 0.012 mol) was added dropwise and the reaction mixture was stirred at RT for 12 h. It was then diluted with water (100 mL) and extracted with ethyl acetate (3 x 50 mL). The combined organic layer was dried over anhydrous sodium sulphate, filtered and concentrated under reduced pressure. The residue was purified by column chromatography to afford 6-ethyl-3-pentylthieno[2,3-*d*]pyrimidin-4(3*H*)-one (**11g**) as off-white solid, 1.885 g (90%). Melting Point: 74°C. <sup>1</sup>H NMR (200MHz, CDCl<sub>3</sub>): δ 0.91 (t, *J* = 7Hz, 3H), 1.28-1.44 (m, 7H), 1.68-1.82 (m, 2H), 2.88 (q, *J* = 7 Hz, 2H), 3.99 (t, *J* = 7 Hz, 2 H), 7.17 (s, 1 H), 7.92 (s, 1H). <sup>13</sup>C NMR (50 MHz, CDCl<sub>3</sub>): δ 13.80, 15.21, 22.17, 23.91, 28.61, 29.17, 46.80, 117.44, 124.77, 145.62, 145.87, 157.22, 162.24. IR (CHCl<sub>3</sub>): 1672 cm<sup>-1</sup>. HRMS (ESI) *m/z* calculated for [C<sub>13</sub>H<sub>18</sub>ON<sub>2</sub>S + H]: 251.1213, found: 251.1210; [C<sub>13</sub>H<sub>18</sub>ON<sub>2</sub>S + Na]: 273.1032 found: 273.1027.

Compounds **11a** to **11f** and **11h** to **11n** were prepared by above method described for **11g** using the corresponding alkyl halides and required thienopyrimidinones. In case of compounds **12a** to **12e**, same procedure was used wherein benzyl bromide was used in place of alkyl halide. Compounds **13a** and **13b** were prepared by using bromoacetonitrile while compounds **14a** to **14c** were prepared by using cyclopropylmethyl bromide.  $\alpha,\alpha'$ -Dibromo-p-xylene was used for preparation of compound **15a**, (1,3-dioxolan-2-yl)ethyl bromide for compounds **16a** and **16b** whereas (1,3-dioxan-2-yl)ethyl bromide was used for getting compound **16c**. Compounds **17a** to **17c** were obtained when 2-chloro-1-(2,4-difluorophenyl)ethan-1-one was reacted with the corresponding thienopyrimidinones. Allyl bromide was used in the preparation of **18a** while ethyl bromoacetate was employed for getting compounds **19a** to **19c**. Hydrolysis of **19b** and **19c** with ethanolic sodium hydroxide afforded compounds **20b** and **20c** respectively. Bromoacetaldehyde diethyl acetal was reacted with the required thienopyrimidinones to get the compounds **21a** and **21b**. Deprotection of **21a** with conc HCl in acetonitrile afforded aldehyde **22a**. The reactions of 2-bromo-1-(thiophen-2-yl)ethan-1-one with various thienopyrimidinones provided corresponding ketones **23a** to **23c**. The reactants and reagents to get compounds with general structures **24** to **38** are shown in Schemes 2-4. All the compounds screened in the present study were characterized by spectral methods and the data are given below:

#### **6-Methyl-3-propylthieno[2,3-d]pyrimidin-4(3H)-one (11a)**

$^1\text{H}$  NMR (400 MHz,  $\text{CDCl}_3$ ):  $\delta$  0.99 (t,  $J=4$  Hz, 3H), 1.75-1.85 (m, 2H), 2.54 (s, 3H), 3.96 (t,  $J=4$  Hz, 2H), 7.13 (s, 1H), 7.92 (s, 1H).  $^{13}\text{C}$  NMR (100 MHz,  $\text{CDCl}_3$ ):  $\delta$  10.95, 15.94, 22.69, 48.30, 119.25, 124.96, 138.45, 145.63, 157.01, 162.38. IR (Neat):  $1664\text{ cm}^{-1}$ . HRMS (ESI)  $m/z$  calculated for  $[\text{C}_{10}\text{H}_{12}\text{N}_2\text{OS}+\text{H}]$ : 209.0743, found: 209.0741;  $[\text{C}_{10}\text{H}_{12}\text{N}_2\text{OS}+\text{Na}]$ : 231.0563, found: 231.0559. Melting Point:  $116^\circ\text{C}$ .

#### **3-Isopropyl-6-methylthieno[2,3-d]pyrimidin-4(3H)-one (11b)**

$^1\text{H}$  NMR (200 MHz,  $\text{CDCl}_3$ ):  $\delta$  1.47 (d,  $J=7$  Hz, 6H), 2.54 (s, 3H), 5.10-5.31 (m, 1H), 7.13 (s, 1H), 8.00 (s, 1H).  $^{13}\text{C}$  NMR (100 MHz,  $\text{CDCl}_3$ ):  $\delta$  15.91, 22.13 (2C), 45.58, 119.33, 124.57, 138.28, 142.66, 156.65, 161.91. IR (Neat):  $1666\text{ cm}^{-1}$ . HRMS (ESI)  $m/z$  calculated for  $[\text{C}_{10}\text{H}_{12}\text{N}_2\text{OS}+\text{H}]$ : 209.0743, found: 209.0743;  $[\text{C}_{10}\text{H}_{12}\text{N}_2\text{OS}+\text{Na}]$ : 231.0563, found: 231.0561. Melting Point:  $64^\circ\text{C}$ .

#### **3-Isobutyl-6-methylthieno[2,3-d]pyrimidin-4(3H)-one (11c)**

$^1\text{H}$  NMR (400 MHz,  $\text{CDCl}_3$ ):  $\delta$  0.97 (d,  $J=8$  Hz, 6H), 2.12-2.25 (m, 1H), 2.54 (s, 3H), 3.80 (d,  $J=7$  Hz, 2H), 7.13 (s, 1H), 7.90 (s, 1H).  $^{13}\text{C}$  NMR (100 MHz,  $\text{CDCl}_3$ ):  $\delta$  16.02, 19.81, 28.14, 53.93, 119.43, 125.07, 138.59, 145.98, 157.24, 162.27. IR ( $\text{CHCl}_3$ ):  $1673\text{ cm}^{-1}$ . HRMS (ESI)  $m/z$  calculated for  $[\text{C}_{11}\text{H}_{14}\text{N}_2\text{OS}+\text{H}]$ : 223.0900, found: 223.0898. Melting Point:  $91^\circ\text{C}$ .

#### **3,6-Diethylthieno[2,3-d]pyrimidin-4(3H)-one (11d)**

$^1\text{H}$  NMR (200 MHz,  $\text{CDCl}_3$ ):  $\delta$  1.35 (t,  $J=8$  Hz, 3H), 1.41 (t,  $J=7$  Hz, 3H), 2.88 (q,  $J=8$  Hz, 2H), 4.07 (q,  $J=7$  Hz, 2H), 7.17 (s, 1H), 7.95 (s, 1H).  $^{13}\text{C}$  NMR (100 MHz,  $\text{CDCl}_3$ ):  $\delta$  15.00, 15.14, 23.84, 41.87, 117.30, 124.67, 145.26, 145.88, 156.96, 162.06. IR ( $\text{CHCl}_3$ ):  $1659\text{ cm}^{-1}$ . HRMS (ESI)  $m/z$  calculated for

[C<sub>10</sub>H<sub>12</sub>ON<sub>2</sub>S+H]: 209.0743, found: 209.0741; [C<sub>10</sub>H<sub>12</sub>ON<sub>2</sub>S+Na]: 231.0563, found: 231.0560. Melting Point: 64.1°C.

### 6-Ethyl-3-propylthieno[2,3-d]pyrimidin-4(3H)-one (11e)

<sup>1</sup>H NMR (200 MHz, CDCl<sub>3</sub>): δ 0.98 (t, *J*=7 Hz, 3H), 1.34 (t, *J*=8 Hz, 3H), 1.70-1.92 (m, 2H), 2.87 (q, *J*=7 Hz, 2H), 3.96 (t, *J*=8 Hz, 2H), 7.15 (s, 1H), 7.92 (s, 1H). <sup>13</sup>C NMR (50 MHz, CDCl<sub>3</sub>): δ 10.85, 15.08, 22.61, 23.78, 48.18, 117.32, 124.63, 145.57, 145.70, 157.09, 162.13. IR (Neat): 1659 cm<sup>-1</sup>. HRMS (ESI) *m/z* calculated for [C<sub>11</sub>H<sub>14</sub>ON<sub>2</sub>S+H]: 223.0900, found: 223.0899. Melting Point: 85 °C.

### 6-Ethyl-3-isopropylthieno[2,3-d]pyrimidin-4(3H)-one (11f)

<sup>1</sup>H NMR (200 MHz, CDCl<sub>3</sub>): δ 1.29 (t, *J*=7 Hz, 3H), 1.42 (d, *J*=7 Hz, 6H), 2.82 (q, *J*=7 Hz, 2H), 5.07-5.25 (m, 1H), 7.10 (s, 1H), 7.97 (s, 1H). <sup>13</sup>C NMR (100 MHz, CDCl<sub>3</sub>): δ 15.20, 22.19 (2C), 23.88, 45.65, 117.54, 124.40, 142.68, 145.81, 156.82, 161.51. IR (Neat): 1649 cm<sup>-1</sup>. HRMS (ESI) *m/z* calculated for [C<sub>11</sub>H<sub>14</sub>ON<sub>2</sub>S+H]: 223.0900, found: 223.0895. [C<sub>11</sub>H<sub>14</sub>O N<sub>2</sub>S+Na]: 245.0719, found: 245.0713. Melting Point: 105°C.

### 6-Ethyl-3-octylthieno[2,3-d]pyrimidin-4(3H)-one (11h)

<sup>1</sup>H NMR (200 MHz, CDCl<sub>3</sub>): δ 0.87 (t, *J*=7 Hz, 3H), 1.17-1.42 (m, 13H), 1.72-1.86 (m, 2H), 2.88 (q, *J*=7 Hz, 2H), 3.99 (t, *J*=7 Hz, 2H), 7.17 (s, 1H), 7.92 (s, 1H). <sup>13</sup>C NMR (125 MHz, CDCl<sub>3</sub>): δ 14.00, 15.25, 22.55, 23.97, 26.58, 29.06, 29.09, 29.54, 31.69, 46.89, 117.53, 124.85, 145.64, 145.94, 157.28, 162.29. IR (CHCl<sub>3</sub>): 1676 cm<sup>-1</sup>. HRMS (ESI) *m/z* calculated for [C<sub>16</sub>H<sub>24</sub>ON<sub>2</sub>S + H]: 293.1682, found: 293.1677; [C<sub>16</sub>H<sub>24</sub>ON<sub>2</sub>S + Na]: 315.1502, found: 315.1494. Melting Point: 62°C.

### 3,6-Dipropylthieno[2,3-d]pyrimidin-4(3H)-one (11i)

<sup>1</sup>H NMR (400 MHz, CDCl<sub>3</sub>): δ 0.92-1.02 (m, 6H), 1.64-1.86 (m, 4H), 2.80 (t, *J*=8 Hz, 2H), 3.95 (t, *J*=8 Hz, 2H), 7.14 (s, 1H), 7.92 (s, 1H). <sup>13</sup>C NMR (100 MHz, CDCl<sub>3</sub>): δ 11.00, 13.74, 22.75, 24.26, 32.57, 48.36, 118.29, 124.78, 144.24, 145.62, 157.26, 162.34. IR (CHCl<sub>3</sub>): 1675 cm<sup>-1</sup>. HRMS (ESI) *m/z* calculated for [C<sub>12</sub>H<sub>16</sub>ON<sub>2</sub>S + H]: 237.1056, found: 237.1055. Melting Point: 58°C.

### 3-Isopropyl-6-propylthieno[2,3-d]pyrimidin-4(3H)-one (11j)

<sup>1</sup>H NMR (400 MHz, CDCl<sub>3</sub>): δ 0.99 (t, *J*=8 Hz, 3H), 1.47 (d, *J*=7 Hz, 6H), 1.65-1.80 (m, 2H), 2.82 (t, *J*=7 Hz, 2H), 5.13-5.27 (m, 1H), 7.15 (s, 1H), 8.00 (s, 1H). <sup>13</sup>C NMR (100 MHz, CDCl<sub>3</sub>): δ 13.49, 22.27 (2C), 24.30, 32.61, 45.69, 118.47, 124.48, 142.68, 144.19, 156.99, 161.92. IR (CHCl<sub>3</sub>): 1668 cm<sup>-1</sup>. HRMS (ESI) *m/z* calculated for [C<sub>12</sub>H<sub>16</sub>ON<sub>2</sub>S + H]: 237.1056, found: 237.1085. Melting Point: 95°C.

### 3-Octyl-6-propylthieno[2,3-d]pyrimidin-4(3H)-one (11k)

<sup>1</sup>H NMR (200 MHz, CDCl<sub>3</sub>): δ 0.87 (t, *J*=7 Hz, 3H), 1.00 (t, *J*=7 Hz, 3H), 1.17-1.42 (m, 10H), 1.65-1.86 (m, 4H), 2.82 (t, *J*=8 Hz, 2H), 3.99 (t, *J*=8 Hz, 2H), 7.16 (s, 1H), 7.93 (s, 1H). <sup>13</sup>C NMR (125 MHz, CDCl<sub>3</sub>): δ 13.49, 14.00, 22.56, 24.30, 26.58, 29.06, 29.09, 29.55, 31.70, 32.62, 46.95, 118.37, 124.88, 144.36, 145.62, 157.22, 162.05. IR (CHCl<sub>3</sub>): 1667 cm<sup>-1</sup>. HRMS (ESI) *m/z* calculated for [C<sub>17</sub>H<sub>26</sub>ON<sub>2</sub>S + H]: 307.1839, found: 307.1835; [C<sub>17</sub>H<sub>26</sub>ON<sub>2</sub>S + Na]: 329.1658, found: 329.1652. Melting Point: 150°C.

### 3-Methyl-6-pentylthieno[2,3-d]pyrimidin-4(3H)-one (11l)

<sup>1</sup>H NMR (200 MHz, CDCl<sub>3</sub>): δ 0.89 (t, *J*=7 Hz, 3H), 1.20-1.45 (m, 4H), 1.60-1.80 (m, 2H), 2.82 (t, *J*=6 Hz, 2H), 3.58 (s, 3H), 7.14 (s, 1H), 7.95 (s, 1H). <sup>13</sup>C NMR (50 MHz, CDCl<sub>3</sub>): δ 13.91, 22.29, 30.54, 30.65, 31.03, 33.96, 118.01, 124.57, 144.74, 145.75, 157.76, 162.51. IR (CHCl<sub>3</sub>): 1668 cm<sup>-1</sup>. HRMS (ESI) *m/z* calculated for [C<sub>12</sub>H<sub>16</sub>ON<sub>2</sub>S + H]: 237.1056, found: 237.1051; [C<sub>12</sub>H<sub>16</sub>ON<sub>2</sub>S + Na]: 259.0876, found: 259.0869. Melting Point: 88°C.

### 6-Pentyl-3-propylthieno[2,3-d]pyrimidin-4(3H)-one (11m)

<sup>1</sup>H NMR (200 MHz, CDCl<sub>3</sub>): δ 0.90 (t, *J*=7 Hz, 3H), 1.00 (t, *J*=7 Hz, 3H), 1.27-1.47 (m, 4H), 1.62-1.94 (m, 4H), 2.84 (t, *J*=8 Hz, 2H), 3.98 (t, *J*=7 Hz, 2H), 7.16 (s, 1H), 8.01 (s, 1H). <sup>13</sup>C NMR (100 MHz, CDCl<sub>3</sub>): δ 10.93, 13.83, 22.20, 22.67, 30.44, 30.60, 30.94, 48.28, 118.08, 124.67, 144.44, 145.57, 157.13, 162.11. IR (CHCl<sub>3</sub>): 1672 cm<sup>-1</sup>. HRMS (ESI) *m/z* calculated for [C<sub>14</sub>H<sub>20</sub>ON<sub>2</sub>S + H]: 265.1369, found: 265.1367; [C<sub>14</sub>H<sub>20</sub>ON<sub>2</sub>S + Na]: 287.1189, found: 287.1185. Melting Point: 141°C.

### 3-Methyl-5,6,7,8-tetrahydrobenzo[4,5]thieno[2,3-d]pyrimidin-4(3H)-one (11n)

<sup>1</sup>H NMR (200 MHz, CDCl<sub>3</sub>): δ 1.75-1.96 (m, 4H), 2.78 (t, *J*=6 Hz, 2H), 3.02 (t, *J*=6 Hz, 2H), 3.55 (s, 3H), 7.91 (s, 1H). <sup>13</sup>C NMR (100 MHz, CDCl<sub>3</sub>): δ 22.18, 22.81, 25.16, 25.57, 33.67, 122.58, 131.37, 134.11, 145.61, 158.27, 162.14. IR (CHCl<sub>3</sub>): 1669 cm<sup>-1</sup>. HRMS (ESI) *m/z* calculated for [C<sub>11</sub>H<sub>12</sub>ON<sub>2</sub>S + H]: 221.0743, found: 221.0740; [C<sub>11</sub>H<sub>12</sub>ON<sub>2</sub>S + Na]: 243.0563, found: 243.0558. Melting Point: 89°C.

### 3-Benzyl-6-ethylthieno[2,3-d]pyrimidin-4(3H)-one (12a)

<sup>1</sup>H NMR (200 MHz, CDCl<sub>3</sub>): δ 1.35 (t, *J*=7 Hz, 3H), 2.88 (q, *J*=7 Hz, 2H), 5.21 (s, 2H), 7.19 (s, 1H), 7.29-7.39 (m, 5H), 8.01 (s, 1H). <sup>13</sup>C NMR (50 MHz, CDCl<sub>3</sub>): δ 15.19, 23.88, 49.22, 117.56, 124.74, 127.93 (2C), 128.33, 128.89 (2C), 135.69, 145.48, 146.17, 157.14, 162.05. IR (Neat): 1666 cm<sup>-1</sup>. HRMS (ESI) *m/z* calculated for [C<sub>15</sub>H<sub>14</sub>ON<sub>2</sub>S+H]: 271.0900, found: 271.0896; [C<sub>15</sub>H<sub>14</sub>ON<sub>2</sub>S+Na]: 293.0719, found: 293.0715. Melting Point: 100°C.

### 3-Benzyl-6-propylthieno[2,3-d]pyrimidin-4(3H)-one (12b)

<sup>1</sup>H NMR (200MHz, CDCl<sub>3</sub>): δ 1.00 (t, *J*=7 Hz, 3H), 1.60-1.85 (m, 2H), 2.82 (t, *J*=7 Hz, 2H), 5.21 (s, 2H), 7.17 (s, 1H), 7.35 (bs, 5H), 8.02 (s, 1H). <sup>13</sup>C NMR (50 MHz, CDCl<sub>3</sub>): δ 13.54, 24.34, 32.63, 49.31, 118.51, 124.86, 128.06(2C), 128.37, 129.01(2C), 135.82, 144.57, 145.54, 157.28, 162.36. IR (CHCl<sub>3</sub>): 1671 cm<sup>-1</sup>. HRMS (ESI) *m/z* calculated for [C<sub>16</sub>H<sub>16</sub>ON<sub>2</sub>S + H]: 285.1056, found: 285.1053; [C<sub>16</sub>H<sub>16</sub>ON<sub>2</sub>S + Na]: 307.0876, found: 307.0871. Melting Point: 93°C.

### 3-Benzyl-6-butylthieno[2,3-d]pyrimidin-4(3H)-one (12c)

<sup>1</sup>H NMR (200 MHz, CDCl<sub>3</sub>): δ 0.95 (t, *J*= 7 Hz, 3H), 1.21-1.53 (m, 2H), 1.60-1.80 (m, 2H), 2.85 (dt, *J*=1, 7 Hz, 2H), 5.21 (s, 2H), 7.17 (t, *J*=1 Hz, 1H), 7.35 (bs, 5H), 8.01 (s, 1H). <sup>13</sup>C NMR (50 MHz, CDCl<sub>3</sub>): δ 13.61, 21.90, 30.17, 33.00, 49.18, 118.26, 124.72, 127.92 (2C), 128.16, 128.87 (2C), 135.71, 144.68, 145.43, 157.13, 162.19. IR (CHCl<sub>3</sub>): 1674, 2403, 3018 cm<sup>-1</sup>. HRMS (ESI) *m/z* calculated for [C<sub>17</sub>H<sub>18</sub>ON<sub>2</sub>S + H]: 299.1213, found: 299.1204. Melting Point: 99°C.

### 3-Benzyl-6-pentylthieno[2,3-d]pyrimidin-4(3H)-one (12d)

<sup>1</sup>H NMR (200 MHz, CDCl<sub>3</sub>): δ 0.91 (t, *J*=7 Hz, 3H), 1.30-1.43 (m, 4H), 1.64-1.79 (m, 2H), 2.84 (t, *J*=8 Hz, 2H), 5.21 (s, 2H), 7.17 (s, 1H), 7.35 (bs, 5H), 8.01 (s, 1H). <sup>13</sup>C NMR (50 MHz, CDCl<sub>3</sub>): δ 13.86, 22.24, 30.48, 30.63, 30.96, 49.21, 118.27, 124.73, 127.94(2C), 128.18, 128.89 (2C), 135.70, 144.76, 145.43, 157.16, 162.20. IR (CHCl<sub>3</sub>): 1674 cm<sup>-1</sup>. HRMS (ESI) *m/z* calculated for [C<sub>18</sub>H<sub>20</sub>ON<sub>2</sub>S + H]: 313.1369, found: 313.1361; [C<sub>18</sub>H<sub>20</sub>ON<sub>2</sub>S + Na]: 335.1189; found: 335.1180. Melting Point: 99<sup>o</sup>C.

### **3-Benzyl-6-hexylthieno[2,3-d]pyrimidin-4(3H)-one (12e)**

<sup>1</sup>H NMR (200 MHz, CDCl<sub>3</sub>): δ 0.89 (t, *J*=7 Hz, 3H), 1.20-1.45 (m, 6H), 1.62-1.74 (m, 2H), 2.83 (t, *J*=8 Hz, 2H), 5.20 (s, 2H), 7.16 (s, 1H), 7.34 (bs, 5H), 8.01 (s, 1H). <sup>13</sup>C NMR (50 MHz, CDCl<sub>3</sub>): δ 13.93, 22.39, 28.45, 30.47, 30.88, 31.33, 49.15, 118.21, 124.67, 127.89 (2C), 128.11, 128.83 (2C), 135.68, 144.68, 145.41, 157.10, 162.16. IR (CHCl<sub>3</sub>): 1674 cm<sup>-1</sup>. HRMS (ESI) *m/z* calculated for [C<sub>19</sub>H<sub>22</sub>ON<sub>2</sub>S + H]: 327.1526, found: 327.1519; [C<sub>19</sub>H<sub>22</sub>ON<sub>2</sub>S + Na]: 349.1345, found: 349.1336. Melting Point: 81<sup>o</sup>C.

### **2-(4-Oxo-6-pentylthieno[2,3-d]pyrimidin-3(4H)-yl)acetonitrile (13a)**

<sup>1</sup>H NMR (200 MHz, CDCl<sub>3</sub>): δ 0.91 (t, *J*=7 Hz, 3H), 1.31-1.41 (m, 4H), 1.65-1.78 (m, 2H), 2.86 (t, *J*=7 Hz, 2H), 4.92 (s, 2H), 7.18 (s, 1H), 8.05 (s, 1H). <sup>13</sup>C NMR (100 MHz, CDCl<sub>3</sub>): δ 13.85, 22.20, 30.47, 30.59, 30.96, 33.47, 113.77, 118.05, 124.10, 143.59, 146.25, 155.91, 162.18. IR (CHCl<sub>3</sub>): 1674 cm<sup>-1</sup>. HRMS (ESI) *m/z* calculated for [C<sub>13</sub>H<sub>15</sub>ON<sub>3</sub>S+H]: 262.1009, found: 262.1003; [C<sub>13</sub>H<sub>15</sub>ON<sub>3</sub>S+Na]: 284.0828, found: 284.0821. Melting Point: 88<sup>o</sup>C.

### **2-(6-Heptyl-4-oxothieno[2,3-d]pyrimidin-3(4H)-yl)acetonitrile (13b)**

<sup>1</sup>H NMR (200 MHz, CDCl<sub>3</sub>): δ 0.89 (t, *J*=7 Hz, 3H), 1.23-1.49 (m, 8H), 1.63-1.78 (m, 2H), 2.86 (t, *J*=8 Hz, 2H), 4.91 (s, 2H), 7.19 (s, 1H), 8.04 (s, 1H). <sup>13</sup>C NMR (50 MHz, CDCl<sub>3</sub>): δ 13.95, 22.48, 28.79 (2C), 30.51, 30.91, 31.57, 33.47, 113.82, 118.03, 124.09, 143.64, 146.23, 155.93, 162.25. IR (CHCl<sub>3</sub>): 1686, 2358 cm<sup>-1</sup>. HRMS (ESI) *m/z* calculated for [C<sub>15</sub>H<sub>19</sub>ON<sub>3</sub>S + H]: 290.1322, found: 290.1318; [C<sub>15</sub>H<sub>19</sub>ON<sub>3</sub>S + Na]: 312.1141, found: 312.1136. Melting Point: 86<sup>o</sup>C.

### **3-(Cyclopropylmethyl)-6-pentylthieno[2,3-d]pyrimidin-4(3H)-one (14a)**

<sup>1</sup>H NMR (200 MHz, CDCl<sub>3</sub>): δ 0.32-0.48 (m, 2H), 0.55-0.70 (m, 2H), 0.88 (t, *J*=7 Hz, 3H), 1.17-1.44 (m, 5H), 1.63-1.75 (m, 2H), 2.82 (t, *J*=7 Hz, 2H), 3.86 (d, *J*=7 Hz, 2H), 7.14 (s, 1H), 7.99 (s, 1H). <sup>13</sup>C NMR (50 MHz, CDCl<sub>3</sub>): δ 4.03 (2C), 10.88, 13.83, 22.22, 30.45, 30.60, 30.95, 50.80, 118.14, 124.66, 144.39, 145.26, 157.31, 162.28. IR (CHCl<sub>3</sub>): 1671 cm<sup>-1</sup>. HRMS (ESI) *m/z* calculated for [C<sub>15</sub>H<sub>20</sub>ON<sub>2</sub>S + H]: 277.1369, found: 277.1369; [C<sub>15</sub>H<sub>20</sub>ON<sub>2</sub>S + Na]: 299.1189, found: 299.1186. Melting Point: 73<sup>o</sup>C

### **3-(Cyclopropylmethyl)-6-hexylthieno[2,3-d]pyrimidin-4(3H)-one (14b)**

<sup>1</sup>H NMR (200 MHz, CDCl<sub>3</sub>): δ 0.36-0.48 (m, 2H), 0.60-0.72 (m, 2H), 0.89 (t, *J*=7 Hz, 3H), 1.17-1.45 (m, 7H), 1.62-1.77 (m, 2H), 2.84 (t, *J*=7 Hz, 2H), 3.88 (d, *J*=7 Hz, 2H), 7.16 (s, 1H), 8.00 (s, 1H). <sup>13</sup>C NMR (125 MHz, CDCl<sub>3</sub>): δ 4.14 (2C), 10.98, 14.03, 22.51, 28.59, 30.62, 31.01, 31.46, 50.93, 118.26, 124.80, 144.56, 145.31, 157.45, 162.39. IR (CHCl<sub>3</sub>): 1683 cm<sup>-1</sup>. HRMS (ESI) *m/z* calculated for [C<sub>16</sub>H<sub>22</sub>ON<sub>2</sub>S + H]: 291.1526, found: 291.1519; [C<sub>16</sub>H<sub>22</sub>ON<sub>2</sub>S + Na]: 313.1345, found: 313.1336. Melting Point: 49<sup>o</sup>C

### **3-(Cyclopropylmethyl)-6-heptylthieno[2,3-d]pyrimidin-4(3H)-one (14c)**

<sup>1</sup>H NMR (200 MHz, CDCl<sub>3</sub>): δ 0.35-0.48 (m, 2H), 0.58-0.69 (m, 2H), 0.87 (t, *J*=7 Hz, 3H), 1.14-1.47 (m, 9H), 1.68-1.76 (m, 2H), 2.83 (t, *J*=7 Hz, 2H), 3.86 (d, *J*=7 Hz, 2H), 7.15 (s, 1H), 8.00 (s, 1H). <sup>13</sup>C NMR (50 MHz, CDCl<sub>3</sub>): δ 4.07 (2C), 10.91, 13.98, 22.52, 28.80, 28.86, 30.53, 30.97, 31.62, 50.84, 118.18, 124.71, 144.45, 145.27, 157.35, 162.32. IR (CHCl<sub>3</sub>): 1678 cm<sup>-1</sup>. HRMS (ESI) *m/z* calculated for [C<sub>17</sub>H<sub>24</sub>ON<sub>2</sub>S + H]: 305.1682, found: 305.1683; [C<sub>17</sub>H<sub>24</sub>ON<sub>2</sub>S + Na]: 327.1502, found: 327.1500. Melting Point: 57<sup>o</sup>C.

### **3-(4-(Bromomethyl)benzyl)-6-propylthieno[2,3-d]pyrimidin-4(3H)-one (15a)**

<sup>1</sup>H NMR (400 MHz, CDCl<sub>3</sub>): δ 1.00 (t, *J*=7 Hz, 3H), 1.68 - 1.80 (m, 2H), 2.82 (t, *J*=7 Hz, 2H), 4.46 (s, 2H), 5.19 (s, 2H), 7.17(s, 1H), 7.30 - 7.35 (m, 2H), 7.35 - 7.41 (m, 2H), 8.01(s, 1H). <sup>13</sup>C NMR (100 MHz, CDCl<sub>3</sub>): δ 13.45, 24.24, 32.54, 32.67, 48.95, 118.38, 124.75, 128.36 (2C), 129.58 (2C), 135.96, 137.86, 144.66, 145.33, 157.12, 162.30. IR (CHCl<sub>3</sub>): 1672 cm<sup>-1</sup>. HRMS (ESI) *m/z* calculated for [C<sub>17</sub>H<sub>17</sub>ON<sub>2</sub><sup>79</sup>BrS + H]: 377.0318, found: 377.0311. Melting Point: 150<sup>o</sup>C.

### **3-(2-(1,3-Dioxolan-2-yl)ethyl)-6-pentylthieno[2,3-d]pyrimidin-4(3H)-one (16a)**

<sup>1</sup>H NMR (400 MHz, CDCl<sub>3</sub>): δ 0.90 (t, *J*=7 Hz, 3H), 1.20-1.47 (m, 4H), 1.60-1.85 (m, 2H), 2.19 (dt, *J*=5, 7 Hz, 2H), 2.83 (t, *J*=7 Hz, 2H), 3.86(t, *J*=6 Hz, 2H), 3.99(t, *J*=6 Hz, 2H), 4.15(t, *J*=7 Hz, 2H), 4.92 (t, *J*=5 Hz, 1H), 7.15 (s, 1H), 7.97 (s, 1H). <sup>13</sup>C NMR (100 MHz, CDCl<sub>3</sub>): δ 13.92, 22.31, 30.56, 30.70, 31.06, 32.27, 42.45, 64.95 (2C), 101.97, 118.16, 124.74, 144.55, 146.09, 157.30, 162.41. IR (CHCl<sub>3</sub>): 1672, 3405 cm<sup>-1</sup>. HRMS (ESI) *m/z* calculated for [C<sub>16</sub>H<sub>22</sub>O<sub>3</sub>N<sub>2</sub>S + H]: 323.1424, found: 323.1424; [C<sub>16</sub>H<sub>22</sub>O<sub>3</sub>N<sub>2</sub>S + Na]: 345.1243, found: 345.1244. Melting Point: 60<sup>o</sup>C.

### **3-(2-(1,3-Dioxolan-2-yl)ethyl)-5,6,7,8-tetrahydrobenzo[4,5]thieno[2,3-d]pyrimidin-4(3H)-one (16b)**

<sup>1</sup>H NMR (400 MHz, CDCl<sub>3</sub>): δ 1.68-2.00 (m, 4H), 2.17 (dt, *J*=5 Hz, 2H), 2.77 (t, *J*=6 Hz, 2H), 3.02(t, *J*=6 Hz, 2H), 3.86 (t, *J*=6 Hz, 2H), 3.98(t, *J*=6 Hz, 2H), 4.11 (t, *J*=7 Hz, 2H), 4.92(t, *J*=5 Hz, 1H), 7.92 (s, 1H). <sup>13</sup>C NMR (100 MHz, CDCl<sub>3</sub>): δ 22.23, 22.86, 25.21, 25.62, 32.30, 42.19, 64.96(2C), 102.00, 122.76, 131.56, 133.99, 145.95, 157.81, 162.09. IR (CHCl<sub>3</sub>): 1669, 3446 cm<sup>-1</sup>. HRMS (ESI) *m/z* calculated for [C<sub>15</sub>H<sub>18</sub>O<sub>3</sub>N<sub>2</sub>S + H]: 307.1111, found: 307.1112; [C<sub>15</sub>H<sub>18</sub>O<sub>3</sub>N<sub>2</sub>S + Na]: 329.0930, found: 329.0930. Melting Point: 77<sup>o</sup>C.

### **3-(2-(1,3-Dioxan-2-yl)ethyl)-5,6,7,8-tetrahydrobenzo[4,5]thieno[2,3-d]pyrimidin-4(3H)-one (16c)**

<sup>1</sup>H NMR (500 MHz, CDCl<sub>3</sub>): δ 1.34 (d, 2H), 1.80-1.92 (m, 4H), 2.04-2.12 (m, 3H), 2.77 (t, *J*=6 Hz, 2H), 3.02 (t, *J*=6 Hz, 2H), 3.72 (t, *J*=12 Hz, 2H), 4.08 (dd, *J*=7 Hz, 2H), 4.59 (t, *J*=6 Hz, 1H), 7.93 (s, 1H). <sup>13</sup>C NMR (125 MHz, CDCl<sub>3</sub>): δ 22.26, 22.28, 25.21, 25.64 (2C), 33.58 42.12, 66.82 (2C), 99.54, 122.77, 131.59, 133.81, 146.25, 157.86, 162.12. IR (CHCl<sub>3</sub>): 1669 cm<sup>-1</sup>. HRMS (ESI) *m/z* calculated for [C<sub>16</sub>H<sub>20</sub>O<sub>3</sub>N<sub>2</sub>S + H]: 321.1267, found: 321.1283; [C<sub>16</sub>H<sub>20</sub>O<sub>3</sub>N<sub>2</sub>S + Na]: 343.1087, found: 343.1104. Melting Point: 111<sup>o</sup>C.

### **3-(2-(2,4-Difluorophenyl)-2-oxoethyl)-6-methylthieno[2,3-d]pyrimidin-4(3H)-one (17a)**

<sup>1</sup>H NMR (500 MHz, CDCl<sub>3</sub>): δ 2.55 (s, 3H), 5.30 (s, 2H), 6.97 (t, *J*=8 Hz, 1H), 7.03 (t, *J*=8 Hz, 1H), 7.12 (s, 1H), 7.87 (s, 1H), 8.04 (q, *J*=8 Hz, 1H). <sup>13</sup>C NMR (125 MHz, CDCl<sub>3</sub>): δ 16.00, 55.01 (d), 104.89 (t), 112.98 (dd), 119.42, 119.52 (d), 124.81, 133.18 (dd), 138.93, 145.78, 156.88, 162.99, 163.26 (dd), 166.69

(dd), 188.28 (d). IR (CHCl<sub>3</sub>): 1682 cm<sup>-1</sup>. HRMS (ESI) m/z calculated for [C<sub>15</sub>H<sub>10</sub>O<sub>2</sub>N<sub>2</sub>F<sub>2</sub>S + H]: 321.0504, found: 321.0507. Melting Point: 177°C.

### **3-(2-(2,4-Difluorophenyl)-2-oxoethyl)-6-propylthieno[2,3-d]pyrimidin-4(3H)-one (17b)**

<sup>1</sup>H NMR (400 MHz, CDCl<sub>3</sub>): δ 0.99 (t, *J*=7 Hz, 3H), 1.68-1.81 (m, 2H), 2.81(t, *J*=8 Hz, 2H), 5.29 (d, *J*=6 Hz, 2H), 6.91-7.05 (m, 2H), 7.13 (s, 1H), 7.88 (s, 1H), 7.98-8.06 (m, 1H). <sup>13</sup>C NMR (100 MHz, CDCl<sub>3</sub>): δ 13.47, 24.27, 32.55, 55.00 (d), 104.83 (t), 112.90 (dd), 118.32, 119.39 (dd), 124.47, 133.10 (dd), 144.61, 145.73, 156.95, 162.70, 163.21 (dd), 166.62 (dd), 188.25 (d). IR (CHCl<sub>3</sub>): 1679 cm<sup>-1</sup>. HRMS (ESI) m/z calculated for [C<sub>17</sub>H<sub>14</sub>O<sub>2</sub>N<sub>2</sub> F<sub>2</sub>S + H]: 349.0817, found: 349.0808; [C<sub>17</sub>H<sub>14</sub>O<sub>2</sub>N<sub>2</sub> F<sub>2</sub>S + Na]: 371.0636, found: 371.0627. Melting Point: 150°C.

### **3-(2-(2,4-Difluorophenyl)-2-oxoethyl)-6-pentylthieno[2,3-d]pyrimidin-4(3H)-one (17c)**

<sup>1</sup>H NMR (200 MHz, CDCl<sub>3</sub>): δ 0.91 (t, *J*=7 Hz, 3H), 1.26-1.46 (m, 4H), 1.62-1.81 (m, 2H), 2.85 (t, *J*=7 Hz, 2H), 5.31 (d, *J*=5 Hz, 2H), 6.90-7.11 (m, 2H), 7.15 (s, 1H), 7.88 (s, 1H), 7.98-8.14 (m, 1H). <sup>13</sup>C NMR (100 MHz, CDCl<sub>3</sub>): δ 13.91, 22.30, 30.54, 30.70, 31.03, 55.02(d), 104.86(t), 112.95(dd), 118.25, 119.42 (dd), 124.52, 133.15 (dd), 144.94, 145.69, 156.98, 162.69, 163.24 (dd), 166.66 (dd), 188.26(d). IR (CHCl<sub>3</sub>): 1683 cm<sup>-1</sup>. MS *m/z* : 377.1 [M+ H]. Melting Point: 138°C.

### **3-Allyl-6-butylthieno[2,3-d]pyrimidin-4(3H)-one (18a)**

<sup>1</sup>H NMR (200 MHz, CDCl<sub>3</sub>): δ 0.92 (t, *J*=8 Hz, 3H), 1.30-1.45 (m, 2H), 1.60-1.75 (m, 2H), 2.82 (t, *J*=8 Hz, 2H), 4.60 (d, *J*=7 Hz, 2H), 5.16-5.29 (m, 2H), 5.91-6.00 (m, 1H), 7.13(s, 1H), 7.91(s, 1H). <sup>13</sup>C NMR (50 MHz, CDCl<sub>3</sub>): δ 13.62, 21.91, 30.19, 33.01, 48.00, 118.19, 118.73, 124.62, 131.91, 144.62, 145.28, 156.89, 162.28. IR (CHCl<sub>3</sub>): 1676 cm<sup>-1</sup>. HRMS (ESI) m/z calculated for [C<sub>13</sub>H<sub>16</sub>ON<sub>2</sub>S + H]: 249.1056, found: 249.1051. Melting Point: 45°C.

### **Ethyl 2-(4-oxo-6-pentylthieno[2,3-d]pyrimidin-3(4H)-yl)acetate (19a)**

<sup>1</sup>H NMR (400 MHz, CDCl<sub>3</sub>): δ 0.90 (t, *J*=7 Hz, 3H), 1.25-1.42 (m, 7H), 1.65-1.78 (m, 2H), 2.83 (t, *J*=7 Hz, 2H), 4.27 (q, *J*=7 Hz, 2H), 4.70 (s, 2H), 7.15 (s, 1H), 7.89 (s, 1H). <sup>13</sup>C NMR (100 MHz, CDCl<sub>3</sub>): δ 13.90, 14.05, 22.29, 30.54, 30.68, 31.02, 47.12, 62.16, 118.24, 124.44, 145.08, 145.42, 156.95, 162.53, 167.21. IR (CHCl<sub>3</sub>): 1666, 1743 cm<sup>-1</sup>. HRMS (ESI) m/z calculated for [C<sub>15</sub>H<sub>20</sub>O<sub>3</sub>N<sub>2</sub>S + H]: 309.1267, found: 309.1263. Melting Point: 80 °C.

### **Ethyl 2-(6-ethyl-4-oxothieno[2,3-d]pyrimidin-3(4H)-yl)acetate (19b)**

<sup>1</sup>H NMR (200 MHz, CDCl<sub>3</sub>): δ 1.30 (t, *J*=7 Hz, 3H), 1.35 (t, *J*=7 Hz, 3H), 2.89 (q, *J*=7 Hz, 2H), 4.26 (q, *J*=7 Hz, 2H), 4.71 (s, 2H), 7.17 (s, 1H), 7.90 (s, 1H). <sup>13</sup>C NMR (50 MHz, CDCl<sub>3</sub>): δ 14.09, 15.27, 23.98, 47.21, 62.18, 117.55, 124.47, 145.65, 146.49, 156.97, 162.45, 167.27. IR (Neat): 1742, 1667 cm<sup>-1</sup>. HRMS (ESI) m/z calculated for [C<sub>12</sub>H<sub>14</sub>O<sub>3</sub>N<sub>2</sub>S+H]: 267.0798, found: 267.0795; [C<sub>12</sub>H<sub>14</sub>O<sub>3</sub>N<sub>2</sub>S+Na]: 289.0617, found: 289.0613. Melting Point: 118°C.

### **2-(6-Ethyl-4-oxothieno[2,3-d]pyrimidin-3(4H)-yl)acetic acid (20b)**

<sup>1</sup>H NMR (200 MHz, CDCl<sub>3</sub>+ MeOH-d<sub>4</sub>): δ 1.15 (t, *J*=8 Hz, 3H), 2.68 (q, *J*=8 Hz, 2H), 4.54 (s, 2H), 6.94 (s, 1H), 7.83 (s, 1H). <sup>13</sup>C NMR (50 MHz, MeOH-d<sub>4</sub>): δ 15.88, 24.88, 50.37, 118.31, 125.41, 148.18, 148.53, 159.10, 164.15, 170.82. IR (CHCl<sub>3</sub>): 1693 (broad), 2400, 3020 cm<sup>-1</sup>. HRMS (ESI) m/z calculated

for [C<sub>10</sub>H<sub>10</sub>O<sub>3</sub>N<sub>2</sub>S+H]: 239.0485, found: 239.0481; [C<sub>10</sub>H<sub>10</sub>O<sub>3</sub>N<sub>2</sub>S+Na]: 261.0304, found: 261.0300. Melting Point: 206°C.

### **2-(6-Methyl-4-oxothieno[2,3-d]pyrimidin-3(4H)-yl)acetic acid (20c)**

<sup>1</sup>H NMR (500 MHz, CDCl<sub>3</sub>): δ 2.28 (s, 3H), 4.47 (s, 2H), 6.84 (s, 1H), 7.79 (s, 1H). <sup>13</sup>C NMR (125MHz, CDCl<sub>3</sub>): δ 15.34, 46.37, 118.61, 123.94, 137.99, 145.81, 156.23, 162.16, 168.57. IR (CHCl<sub>3</sub>): 1664 (broad), 3025 cm<sup>-1</sup>. HRMS (ESI) m/z calculated for [C<sub>9</sub>H<sub>8</sub>O<sub>3</sub>N<sub>2</sub>S + H]: 225.0328, found: 225.0439; [C<sub>9</sub>H<sub>8</sub>O<sub>3</sub>N<sub>2</sub>S + Na]: 247.0148, found: 247.0269. Melting Point: 225°C.

### **3-(2,2-Diethoxyethyl)-6-methylthieno[2,3-d]pyrimidin-4(3H)-one (21b)**

<sup>1</sup>H NMR (200 MHz, CDCl<sub>3</sub>): δ 0.96-1.22 (m, 6H), 2.44 (s, 3H), 3.31-3.53 (m, 2H), 3.57-3.80 (m, 2H), 3.97 (d, *J*=6 Hz, 2H), 4.62 (t, *J*=6 Hz, 1H), 7.01 (s, 1H), 7.89 (s, 1H). <sup>13</sup>C NMR (50 MHz, CDCl<sub>3</sub>): δ 15.06 (2C), 15.84, 49.03, 64.09 (2C), 99.75, 119.04, 124.33, 138.31, 146.75, 157.12, 162.73. IR (CHCl<sub>3</sub>): 1062, 1676 cm<sup>-1</sup>. HRMS (ESI) m/z calculated for [C<sub>13</sub>H<sub>18</sub>O<sub>3</sub>N<sub>2</sub>S + H]: 283.1111, found: 283.1104; [C<sub>13</sub>H<sub>18</sub>O<sub>3</sub>N<sub>2</sub>S + Na]: 305.0930, found: 305.0923. Melting Point: 45°C.

### **2-(6-Butyl-4-oxothieno[2,3-d]pyrimidin-3(4H)-yl)acetaldehyde (22a)**

<sup>1</sup>H NMR (400 MHz, CDCl<sub>3</sub>): δ 0.91 (t, *J*=7 Hz, 3H), 1.32-1.43 (m, 2H), 1.61-1.71 (m, 2H), 2.81 (t, *J*=7 Hz, 2H), 4.80 (s, 1H), 7.09 (s, 1H), 7.85 (s, 1H), 9.68 (s, 1H). <sup>13</sup>C NMR (100 MHz, CDCl<sub>3</sub>): δ 13.63, 21.92, 30.17, 32.98, 54.84, 117.99, 124.23, 145.22, 145.31, 156.86, 162.54, 193.70. IR (CHCl<sub>3</sub>): 1670, 1722, 2729 cm<sup>-1</sup>. HRMS (ESI) m/z calculated for [C<sub>12</sub>H<sub>14</sub>O<sub>2</sub>N<sub>2</sub>S + H]: 251.0849, found: 251.0842. Melting Point: 90°C.

### **3-(2-Oxo-2-(thiophen-2-yl)ethyl)-6-propylthieno[2,3-d]pyrimidin-4(3H)-one (23a)**

<sup>1</sup>H NMR (200 MHz, CDCl<sub>3</sub>): δ 0.99 (t, *J*=7 Hz, 3H), 1.63-1.85 (m, 2H), 2.81 (t, *J*=7 Hz, 2H), 5.34 (s, 2H), 7.13 (s, 1H), 7.16-7.24 (m, 1H), 7.72-7.79 (m, 1H), 7.89-7.97 (m, 2H). <sup>13</sup>C NMR (100 MHz, CDCl<sub>3</sub>): δ 13.49, 24.29, 32.57, 50.91, 118.33, 124.41 (t), 128.49, 132.92, 135.18, 140.61, 144.65, 145.79, 156.93, 162.67, 184.46. IR (CHCl<sub>3</sub>): 1676 cm<sup>-1</sup>. HRMS (ESI) m/z calculated for [C<sub>15</sub>H<sub>14</sub>O<sub>2</sub>N<sub>2</sub>S<sub>2</sub>+ H]: 319.0569, found: 319.0562; [C<sub>15</sub>H<sub>14</sub>O<sub>2</sub>N<sub>2</sub>S<sub>2</sub> + Na]: 341.0389, found: 341.0381. Melting Point: 133°C.

### **6-Hexyl-3-(2-oxo-2-(thiophen-2-yl)ethyl)thieno[2,3-d]pyrimidin-4(3H)-one (23b)**

<sup>1</sup>H NMR (400 MHz, CDCl<sub>3</sub>): δ 0.88 (t, *J*=7 Hz, 3H), 1.25-1.40 (m, 6H), 1.60-1.80 (m, 2H), 2.82 (t, *J*=7 Hz, 2H), 5.33 (s, 2H), 7.11 (s, 1H), 7.16-7.20 (m, 1H), 7.72-7.75 (m, 1H), 7.89-7.93 (m, 2H). <sup>13</sup>C NMR (100 MHz, CDCl<sub>3</sub>): δ 13.99, 22.45, 28.53, 30.54, 30.95, 31.40, 50.90, 118.16, 124.37, 128.45, 132.90, 135.12, 140.58, 144.90, 145.78, 156.89, 162.60, 184.46. IR (CHCl<sub>3</sub>): 1676 cm<sup>-1</sup>. HRMS (ESI) m/z calculated for [C<sub>18</sub>H<sub>20</sub>O<sub>2</sub>N<sub>2</sub>S<sub>2</sub> + H]: 361.1039, found: 361.1028; [C<sub>18</sub>H<sub>20</sub>O<sub>2</sub>N<sub>2</sub>S<sub>2</sub> + Na]: 383.0858, found: 383.0846. Melting Point: 117°C.

### **3-(2-Oxo-2-(thiophen-2-yl)ethyl)-5,6,7,8-tetrahydrobenzo[4,5]thieno[2,3-d]pyrimidin-4(3H)-one (23c)**

<sup>1</sup>H NMR (400 MHz, CDCl<sub>3</sub>): δ 1.71-1.94 (m, 4H), 2.79 (t, *J*=6 Hz, 2H), 2.98 (t, *J*=6 Hz, 2H), 5.29 (s, 2H), 7.21 (t, *J*=5 Hz, 1H), 7.76 (d, *J*=5 Hz, 1H), 7.89 (s, 1H), 7.94 (d, *J*=5 Hz, 1H). <sup>13</sup>C NMR (100 MHz, CDCl<sub>3</sub>): δ 22.18, 22.82, 25.20, 25.53, 50.79, 122.55, 128.49, 131.63, 132.86, 134.47, 135.15,

140.69, 145.64, 157.46, 162.35, 184.60. IR (CHCl<sub>3</sub>): 1674 cm<sup>-1</sup>. HRMS (ESI) m/z calculated for [C<sub>16</sub>H<sub>14</sub>O<sub>2</sub>N<sub>2</sub>S<sub>2</sub> + H]: 331.0569, found: 331.0561; [C<sub>16</sub>H<sub>14</sub>O<sub>2</sub>N<sub>2</sub>S<sub>2</sub> + Na]: 353.0389, found: 353.0380. Melting Point: 199°C.

### **3-(2-Bromoethyl)-6-methylthieno[2,3-d]pyrimidin-4(3H)-one (24a)**

<sup>1</sup>H NMR (200 MHz, CDCl<sub>3</sub>): δ 2.55 (s, 3H), 3.76 (t, *J*=6 Hz, 2H), 4.38 (t, *J*=6 Hz, 2H), 7.13 (s, 1H), 7.99 (s, 1H). <sup>13</sup>C NMR (50 MHz, CDCl<sub>3</sub>): δ 15.98, 29.70, 48.68, 119.15, 124.75, 138.98, 145.70, 156.86, 162.99. IR (KBr): 1660 cm<sup>-1</sup>. HRMS (ESI) m/z calculated for [C<sub>9</sub>H<sub>9</sub>ON<sub>2</sub><sup>79</sup>BrS + H]: 272.9692, found: 272.9685; [C<sub>9</sub>H<sub>9</sub>ON<sub>2</sub><sup>81</sup>BrS + Na]: 274.9671, found: 274.9659. Melting Point: 137 °C.

### **3-(2-Bromoethyl)-6-ethylthieno[2,3-d]pyrimidin-4(3H)-one (24b)**

<sup>1</sup>H NMR (200 MHz CDCl<sub>3</sub>): δ 1.36 (t, *J*=7Hz, 3H), 2.90 (q, *J*=7 Hz, 2H), 3.77 (t, *J*=6 Hz, 2H), 4.38 (t, *J*=6 Hz, 2H), 7.18 (s, 1H), 7.99 (s 2H). <sup>13</sup>C NMR (50MHz CDCl<sub>3</sub>): δ 15.29, 24.01, 29.82, 48.75, 117.38, 124.58, 145.80, 146.46, 157.06, 162.74. IR (CHCl<sub>3</sub>): 1674 cm<sup>-1</sup>. HRMS (ESI) m/z calculated for [C<sub>10</sub>H<sub>11</sub>ON<sub>2</sub><sup>79</sup>BrS + H]: 286.9848, found: 286.9847; [C<sub>10</sub>H<sub>11</sub>ON<sub>2</sub><sup>81</sup>BrS + Na]: 288.9828, found: 288.9824. Melting Point: 123°C.

### **3-(2-Bromoethyl)-6-propylthieno[2,3-d]pyrimidin-4(3H)-one (24c)**

<sup>1</sup>H NMR (400 MHz, CDCl<sub>3</sub>): δ 1.00 (t, *J*=7 Hz, 3H), 1.70-1.81 (m, 2H), 2.83 (t, *J*=8 Hz, 2H), 3.76 (t, *J*=5 Hz, 2H), 4.38 (t, *J*=5 Hz, 2H), 7.16 (s, 1H), 7.99 (s, 1H). <sup>13</sup>C NMR (100 MHz, CDCl<sub>3</sub>): δ 13.52, 24.30, 29.77, 32.62, 48.76, 118.17, 124.55, 144.81, 145.69, 157.05, 162.810. IR (CHCl<sub>3</sub>): 1674 cm<sup>-1</sup>. MS *m/z* : 300, 302 [M<sup>+</sup>]. Melting Point: 106°C.

### **3-(2-Bromoethyl)-6-butylthieno[2,3-d]pyrimidin-4(3H)-one (24d)**

<sup>1</sup>H NMR (200 MHz, CDCl<sub>3</sub>): δ 0.95 (t, *J*=7 Hz, 3H), 1.30-1.53 (m, 2H), 1.59-1.81 (m, 2H), 2.86 (t, *J*=8 Hz, 2H), 3.77 (t, *J*=6 Hz, 2H), 4.39 (t, *J*=6 Hz, 2H), 7.16 (s, 1H), 8.03 (s, 1H). <sup>13</sup>C NMR (100 MHz, CDCl<sub>3</sub>): δ 13.67, 21.95, 29.82, 30.25, 31.12, 48.29, 118.15, 124.50, 144.57, 145.70, 157.02, 162.71. IR (CHCl<sub>3</sub>): 1671 cm<sup>-1</sup>. MS *m/z* : 315.0, 317.0 [M<sup>+</sup>]. Melting Point: 86°C.

### **3-(2-Bromoethyl)-6-hexylthieno[2,3-d]pyrimidin-4(3H)-one (24e)**

<sup>1</sup>H NMR (200 MHz, CDCl<sub>3</sub>): δ 0.90 (t, *J*=7 Hz, 3H), 1.23-1.47 (m, 6H), 1.66-1.78 (m, 2H), 2.85 (t, *J*=8 Hz, 2H), 3.77 (t, *J*=6 Hz, 2H), 4.39 (t, *J*=6 Hz, 2H), 7.16 (s, 1H), 8.02 (s, 1H). <sup>13</sup>C NMR (100 MHz, CDCl<sub>3</sub>): δ 13.96, 22.43, 28.51, 29.79, 30.54, 31.13, 31.38, 45.26, 118.00, 124.68, 144.92, 145.57, 157.21, 162.44. IR (CHCl<sub>3</sub>): 1675 cm<sup>-1</sup>. MS *m/z* : 344.1 [M+ H] Melting Point: 60°C.

### **3-(2-Bromoethyl)-6-heptylthieno[2,3-d]pyrimidin-4(3H)-one (24f)**

<sup>1</sup>H NMR (200 MHz, CDCl<sub>3</sub>): δ 0.88 (t, *J*=7 Hz, 3H), 1.20-1.46 (m, 8H), 1.65-1.78 (m, 2H), 2.85 (t, *J*=7 Hz, 2H), 3.76 (t, *J*=6 Hz, 2H), 4.39 (t, *J*=6 Hz, 2H), 7.16 (s, 1H), 8.05 (s, 1H). <sup>13</sup>C NMR (50 MHz, CDCl<sub>3</sub>): δ 13.98, 22.54, 28.87(2C), 29.68, 30.57, 30.99, 31.63, 48.71, 118.03, 124.53, 145.06, 145.65, 158.97, 162.63. IR (CHCl<sub>3</sub>): 1674 cm<sup>-1</sup>. HRMS (ESI) m/z calculated for [C<sub>15</sub>H<sub>21</sub>ON<sub>2</sub><sup>79</sup>BrS + H]: 357.0631, found: 357.0628; [C<sub>15</sub>H<sub>21</sub>ON<sub>2</sub><sup>79</sup>BrS + Na]: 379.0450, found: 379.0446. Melting Point: 102°C.

### **3-(2-Bromoethyl)-6-decylthieno[2,3-d]pyrimidin-4(3H)-one (24g)**

<sup>1</sup>H NMR (200 MHz, CDCl<sub>3</sub>): δ 0.88 (t, *J*=7 Hz, 3H), 1.19-1.45 (m, 14H), 1.72 (t, *J*=7 Hz, 2H), 2.85 (t, *J*=8 Hz, 2H), 3.77 (t, *J*=6 Hz, 2H), 4.38 (t, *J*=6 Hz, 2H), 7.16 (s, 1H), 7.99 (s, 1H). <sup>13</sup>C NMR (50 MHz, CDCl<sub>3</sub>): δ 14.07, 22.63, 28.91, 29.25 (2C), 29.46, 29.52, 29.76, 30.60, 31.02, 31.84, 48.73, 118.03, 124.53, 145.08, 145.66, 157.02, 162.75. IR (CHCl<sub>3</sub>): 1676 cm<sup>-1</sup>. HRMS (ESI) *m/z* calculated for [C<sub>18</sub>H<sub>27</sub>ON<sub>2</sub>S<sup>79</sup>Br + H]: 399.1100, found: 399.1102; [C<sub>18</sub>H<sub>27</sub>ON<sub>2</sub>S<sup>79</sup>Br + Na]: 421.0920, found: 421.0920. Melting Point: 73°C.

### **3-(2-Bromoethyl)-6-(non-8-en-1-yl)thieno[2,3-d]pyrimidin-4(3H)-one (24h)**

<sup>1</sup>H NMR (400 MHz, CDCl<sub>3</sub>): δ 1.23-1.49 (m, 8H), 1.65-1.83 (m, 2H), 1.97-2.09 (m, 2H), 2.84 (t, *J*=8 Hz, 2H), 3.76 (t, *J*=6 Hz, 2H), 4.38 (t, *J*=6 Hz, 2H), 4.90-5.07 (m, 2H), 5.73-5.90 (m, 1H), 7.15 (s, 1H), 7.99 (s, 1H). <sup>13</sup>C NMR (100 MHz, CDCl<sub>3</sub>): δ 28.80, 28.83, 28.90, 29.07, 29.76, 30.58, 30.98, 33.70, 48.74, 114.19, 118.05, 124.53, 139.05, 145.03, 145.67, 157.02, 162.75. IR (CHCl<sub>3</sub>): 1674 cm<sup>-1</sup>. HRMS (ESI) *m/z* calculated for [C<sub>17</sub>H<sub>23</sub>ON<sub>2</sub><sup>79</sup>BrS + H]: 383.0787, found: 383.0786; [C<sub>17</sub>H<sub>23</sub>ON<sub>2</sub><sup>79</sup>BrS + Na]: 405.0607, found: 405.0605. Melting Point: 150°C.

### **3-(2-Bromoethyl)-3,5,6,7-tetrahydro-4H-cyclopenta[4,5]thieno[2,3-d]pyrimidin-4-one (24i)**

<sup>1</sup>H NMR (200 MHz, CDCl<sub>3</sub>): δ 2.40-2.57 (m, 2H), 2.93-3.13 (m, 4H), 3.77 (t, *J*=6 Hz, 2H), 4.37 (t, *J*=6 Hz, 2H), 7.94 (s, 1H). <sup>13</sup>C NMR (100 MHz, CDCl<sub>3</sub>): δ 28.01, 28.92, 29.59, 29.74, 48.63, 120.17, 140.00, 140.21, 145.28, 157.36, 167.29. IR (CHCl<sub>3</sub>): 1667 cm<sup>-1</sup>. HRMS (ESI) *m/z* calculated for [C<sub>11</sub>H<sub>11</sub>ON<sub>2</sub><sup>79</sup>BrS + H]: 298.9848, found: 298.9842; [C<sub>11</sub>H<sub>11</sub>ON<sub>2</sub><sup>81</sup>BrS + Na]: 300.9828, found: 300.9820. Melting point: 176°C.

### **3-(2-Bromoethyl)-3,5,6,7,8,9-hexahydro-4H-cyclohepta[4,5]thieno[2,3-d]pyrimidin-4-one (24j)**

<sup>1</sup>H NMR (200 MHz, CDCl<sub>3</sub>): δ 1.68-1.72 (m, 4H), 1.88-1.91 (m, 2H), 2.81-2.86 (m, 2H), 3.30-3.33 (m, 2H), 3.76 (t, *J*=5 Hz, 2H), 4.34 (t, *J*=5 Hz, 2H), 7.95 (s, 1H). <sup>13</sup>C NMR (125 MHz, CDCl<sub>3</sub>): δ 27.19, 27.66(2C), 27.93, 30.01, 32.55, 48.69, 123.16, 137.18, 138.93, 145.37, 157.97, 160.48. IR (KBr): 1658 cm<sup>-1</sup>. HRMS (ESI) *m/z* calculated for [C<sub>13</sub>H<sub>15</sub>ON<sub>2</sub><sup>79</sup>BrS + H]: 327.0161, found: 327.0153; [C<sub>13</sub>H<sub>15</sub>ON<sub>2</sub><sup>81</sup>BrS + Na]: 329.0141, found: 329.0128. Melting Point: 142°C.

### **3-(3-Bromopropyl)-6-propylthieno[2,3-d]pyrimidin-4(3H)-one (25a)**

<sup>1</sup>H NMR (200 MHz, CDCl<sub>3</sub>): δ 0.99 (t, *J*=7 Hz, 3H), 1.62-1.85 (m, 2H), 2.27-2.45 (m, 2H), 2.82 (t, *J*=7 Hz, 2H), 3.42 (t, *J*=7 Hz, 2H), 4.18 (t, *J*=7 Hz, 2H), 7.14 (s, 1H), 8.01 (s, 1H). <sup>13</sup>C NMR (50 MHz, CDCl<sub>3</sub>): δ 13.43, 24.22, 29.82, 31.08, 32.51, 45.24, 118.08, 124.64, 144.60, 145.58, 157.19, 162.45. IR (CHCl<sub>3</sub>): 1668 cm<sup>-1</sup>. HRMS (ESI) *m/z* calculated for [C<sub>12</sub>H<sub>15</sub>ON<sub>2</sub><sup>79</sup>Br S + H]: 315.0161, found: 315.0157; [C<sub>12</sub>H<sub>15</sub>ON<sub>2</sub><sup>79</sup>Br S + Na]: 336.9981, found: 336.9976. Melting Point: 107°C.

### **3-(3-Bromopropyl)-6-butylthieno[2,3-d]pyrimidin-4(3H)-one (25b)**

<sup>1</sup>H NMR (200 MHz, CDCl<sub>3</sub>): δ 0.95 (t, *J*=7 Hz, 3H), 1.28-1.52 (m, 2H), 1.60-1.82 (m, 2H), 2.37 (quin, *J*=6 Hz, 2H), 2.85 (t, *J*=7 Hz, 2H), 3.43 (t, *J*=6 Hz, 2H), 4.18 (t, *J*=7 Hz, 2H), 7.15 (s, 1H), 8.01 (s, 1H). <sup>13</sup>C NMR (50 MHz, CDCl<sub>3</sub>): δ 13.67, 21.95, 29.82, 30.25, 31.12, 33.06, 45.29, 118.03, 124.70, 144.92, 145.59, 157.25, 162.48. IR (CHCl<sub>3</sub>): 1672 cm<sup>-1</sup>. HRMS (ESI) *m/z* calculated for [C<sub>13</sub>H<sub>17</sub>ON<sub>2</sub><sup>79</sup>BrS + H]: 329.0318, found: 329.0320; [C<sub>13</sub>H<sub>17</sub>ON<sub>2</sub><sup>81</sup>BrS + H]: 331.0297, found: 331.0298. Melting Point: 93°C.

### **3-(3-Bromopropyl)-6-hexylthieno[2,3-d]pyrimidin-4(3H)-one (25c)**

<sup>1</sup>H NMR (200 MHz, CDCl<sub>3</sub>): δ 0.89 (t, *J*=7 Hz, 3H), 1.16-1.50 (m, 6H), 1.58-1.81 (m, 2H), 2.26-2.46 (m, 2H), 2.84 (t, *J*=8 Hz, 2H), 3.43 (t, *J*=7 Hz, 2H), 4.18 (t, *J*=7 Hz, 2H), 7.15 (s, 1H), 8.01 (s, 1H). <sup>13</sup>C NMR (100 MHz, CDCl<sub>3</sub>): δ 13.99, 22.48, 28.54, 29.82, 30.59, 30.97, 31.16, 31.42, 45.30, 118.04, 124.74, 144.99, 145.59, 157.27, 162.50. IR (CHCl<sub>3</sub>): 1672 cm<sup>-1</sup>. HRMS (ESI) *m/z* calculated for [C<sub>15</sub>H<sub>21</sub>ON<sub>2</sub><sup>79</sup>BrS + H]: 357.0631, found: 357.0626; [C<sub>15</sub>H<sub>21</sub>ON<sub>2</sub><sup>81</sup>BrS + Na]: 359.0610, found: 359.0601. Melting Point: 70°C.

### **3-(3-Bromopropyl)-6-heptylthieno[2,3-d]pyrimidin-4(3H)-one (25d)**

<sup>1</sup>H NMR (200 MHz, CDCl<sub>3</sub>): δ 0.87 (t, *J*=7 Hz, 3H), 1.18-1.40 (m, 8H), 1.58-1.80 (m, 2H), 2.25-2.49 (m, 2H), 2.82 (t, *J*=7 Hz, 2H), 3.41 (t, *J*=6 Hz, 2H), 4.17 (t, *J*=6 Hz, 2H), 7.12 (s, 1H), 8.00 (s, 1H). <sup>13</sup>C NMR (50 MHz, CDCl<sub>3</sub>): δ 13.93, 22.46, 28.74, 28.79, 29.78, 30.47, 30.90, 31.06, 31.55, 45.19, 117.92, 124.59, 144.82, 145.53, 157.13, 162.36. IR (CHCl<sub>3</sub>): 1670 cm<sup>-1</sup>. HRMS (ESI) *m/z* calculated for [C<sub>16</sub>H<sub>23</sub>ON<sub>2</sub><sup>79</sup>BrS + H]: 371.0787, found: 371.0785; [C<sub>16</sub>H<sub>23</sub>ON<sub>2</sub><sup>79</sup>BrS + Na]: 393.0607, found : 393.0605. Melting Point: 75°C.

### **3-(3-Bromopropyl)-5,6,7,8-tetrahydrobenzo[4,5]thieno[2,3-d]pyrimidin-4(3H)-one (25e)**

<sup>1</sup>H NMR (400 MHz, CDCl<sub>3</sub>): δ 1.89-1.94 (m, 4H), 2.31-2.42 (m, 2H), 2.79 (t, *J*=6 Hz, 2H), 3.02 (t, *J*=6 Hz, 2H), 3.43 (t, *J*=7 Hz, 2H), 4.15 (t, *J*=7 Hz, 2H), 7.79 (s, 1H). <sup>13</sup>C NMR (50 MHz, CDCl<sub>3</sub>): δ 22.17, 22.79, 25.18, 25.58, 29.91, 31.12, 45.09, 122.72, 131.45, 134.39, 145.46, 157.79, 162.13. IR (CHCl<sub>3</sub>): 1669 cm<sup>-1</sup>. HRMS (ESI) *m/z* calculated for [C<sub>13</sub>H<sub>15</sub>O<sup>79</sup>BrN<sub>2</sub>S + H]: 327.0161, found: 327.0156; [C<sub>13</sub>H<sub>15</sub>O<sup>79</sup>BrN<sub>2</sub>S + Na]: 348.9981, found: 348.9974. Melting Point: 122.2°C

### **6-Ethyl-3-(2-hydroxyethyl)thieno[2,3-d]pyrimidin-4(3H)-one (26a)**

<sup>1</sup>H NMR (200 MHz, CDCl<sub>3</sub>): δ 1.35(t, *J*=7 Hz, 3H), 2.87 (q, *J*=7 Hz, 2H), 3.15 (bs, 1H), 3.97(t, *J*=5 Hz, 2H), 4.15 (t, *J*=5 Hz, 2H), 7.07 (s, 1H), 7.99 (s, 1H). <sup>13</sup>C NMR (100 MHz, CDCl<sub>3</sub>): δ 15.22, 24.01, 46.87, 48.47, 117.22, 124.39, 126.29, 144.70, 147.26, 147.85, 157.17, 162.76, 184.63. IR (CHCl<sub>3</sub>): 1672, 3408 (bs) cm<sup>-1</sup>. HRMS (ESI) *m/z* calculated for [C<sub>10</sub>H<sub>12</sub>O<sub>2</sub>N<sub>2</sub>S + H]: 225.0692, found: 225.0732; [C<sub>10</sub>H<sub>12</sub>O<sub>2</sub>N<sub>2</sub>S + Na]: 247.0512, found: 247.0555. Melting Point:-110°C.

### **6-Hexyl-3-(2-hydroxyethyl)thieno[2,3-d]pyrimidin-4(3H)-one (26b)**

<sup>1</sup>H NMR (200 MHz, CDCl<sub>3</sub>): δ 0.90 (t, *J*=7 Hz, 3H), 1.25-1.45 (m, 6H), 1.65-1.76 (m, 2H), 2.35 (bs, 1H), 2.83 (t, *J*=8 Hz, 2H), 3.97 (t, *J*=6 Hz, 2H), 4.17 (t, *J*=6 Hz, 2H), 7.10 (s, 1H), 8.01 (s, 1H). <sup>13</sup>C NMR (125 MHz, CDCl<sub>3</sub>): δ 13.98, 22.48, 28.62, 30.58, 30.95, 31.44, 49.40, 60.48, 117.87, 124.44, 144.84, 146.38, 157.66, 162.48. IR (CHCl<sub>3</sub>): 1671, 3409 (bs) cm<sup>-1</sup>. HRMS (ESI) *m/z* calculated for [C<sub>14</sub>H<sub>20</sub>O<sub>2</sub>N<sub>2</sub>S + H]: 281.1318, found: 281.1348; [C<sub>14</sub>H<sub>20</sub>O<sub>2</sub>N<sub>2</sub>S + Na]: 303.1138, found: 303.1169. Melting Point: 79°C.

### **6-Decyl-3-(2-hydroxyethyl)thieno[2,3-d]pyrimidin-4(3H)-one (26c)**

<sup>1</sup>H NMR (200 MHz, CDCl<sub>3</sub>): δ 0.88 (t, *J*=7 Hz, 3H), 1.18-1.43 (m, 14H), 1.62-1.78 (m, 2H), 2.82 (t, *J*=8 Hz, 2H), 2.97(t, *J*=5 Hz, 1H), 3.97 (q, *J*=5 Hz, 2H), 4.16 (t, *J*=5 Hz, 2H), 7.08 (s, 1H), 7.99 (s, 1H). <sup>13</sup>C NMR (100 MHz, CDCl<sub>3</sub>): δ 14.08, 22.65, 28.96, 29.27 (2C), 29.49, 29.54, 30.61, 31.03, 31.85, 49.42, 60.70, 117.91, 124.48, 144.92, 146.31, 157.78, 162.56. IR (CHCl<sub>3</sub>): 1675, 3408 (bs) cm<sup>-1</sup>. HRMS (ESI) *m/z* calculated for [C<sub>18</sub>H<sub>28</sub>O<sub>2</sub>N<sub>2</sub>S + H]: 337.1944, found: 337.1937; [C<sub>18</sub>H<sub>28</sub>O<sub>2</sub>N<sub>2</sub>S + Na]: 359.1764 found: 359.1756. Melting Point: 62°C.

### **3-(2-Hydroxyethyl)-3,5,6,7,8,9-hexahydro-4H-cyclohepta[4,5]thieno[2,3-d]pyrimidin-4-one (26d)**

<sup>1</sup>H NMR (200 MHz, CDCl<sub>3</sub>): δ 1.65(m, 4H), 1.86-1.93(m, 2H), 2.81-2.89(m, 2H), 3.27-3.35(m, 2H), 3.97(t, *J*=5Hz, 2H), 4.17(t, *J*=5Hz, 2H), 8.05(s, 1H). <sup>13</sup>C NMR (100 MHz, CDCl<sub>3</sub>): δ 26.58, 27.04, 27.18, 29.21, 31.82, 48.24, 58.76, 122.46, 136.31, 137.06, 146.03, 157.71, 160.06. IR (CHCl<sub>3</sub>): 1670, 3402 (bs) cm<sup>-1</sup>. HRMS (ESI) *m/z* calculated for [C<sub>13</sub>H<sub>16</sub>O<sub>2</sub>N<sub>2</sub>S + H]: 265.1005, found: 265.1013. Melting Point: 153°C.

### **3-(3-Hydroxypropyl)-5,6,7,8-tetrahydrobenzo[4,5]thieno[2,3-d]pyrimidin-4(3H)-one (27a)**

<sup>1</sup>H NMR (400 MHz, CDCl<sub>3</sub>): δ 1.78-1.93 (m, 4H), 1.98 (q, *J*=6 Hz, 2H), 2.79 (t, *J*=6 Hz, 2H), 3.02(t, *J*=6 Hz, 2H), 3.59 (t, *J*=6 Hz, 2H), 4.17 (t, *J*=6 Hz, 2H), 7.94 (s, 1H). <sup>13</sup>C NMR (100 MHz, CDCl<sub>3</sub>): δ 22.19, 22.81, 25.25, 25.66, 32.41, 42.51, 57.85, 122.51, 131.56, 134.62, 145.43, 158.78, 162.40. IR (CHCl<sub>3</sub>): 1662, 3416 cm<sup>-1</sup>. HRMS (ESI) *m/z* calculated for [C<sub>13</sub>H<sub>16</sub>O<sub>2</sub>N<sub>2</sub>S + H]: 265.1005, found: 265.1006; [C<sub>13</sub>H<sub>16</sub>O<sub>2</sub>N<sub>2</sub>S + Na]: 287.0825, found: 287.0822. Melting Point: 129°C.

### **3-(4-Oxo-5,6,7,8-tetrahydrobenzo[4,5]thieno[2,3-d]pyrimidin-3(4H)-yl)propanal (28a)**

<sup>1</sup>H NMR (400 MHz, CDCl<sub>3</sub>): δ 1.77-1.91(m, 4H), 2.76 (t, *J*=6 Hz, 2H), 2.98 (t, *J*=6 Hz, 2H), 3.08 (t, *J*=6 Hz, 2H), 4.23 (t, *J*=6 Hz, 2H), 8.10 (s, 1H), 9.78 (s, 1H). <sup>13</sup>C NMR (100 MHz, CDCl<sub>3</sub>): δ 22.18, 22.80, 25.16, 25.55, 40.55, 42.36, 122.58, 131.31, 134.32, 146.22, 157.85, 162.16, 199.37. IR (CHCl<sub>3</sub>): 1667, 1721, 2727 cm<sup>-1</sup>. HRMS (ESI) *m/z* calculated for [C<sub>13</sub>H<sub>14</sub>O<sub>2</sub>N<sub>2</sub>S + H]: 263.0849, found: 263.0844. Melting Point: 132°C.

### **3-(2-Azidoethyl)-6-methylthieno[2,3-d]pyrimidin-4(3H)-one (29a)**

<sup>1</sup>H NMR (200 MHz, CDCl<sub>3</sub>): δ 2.56 (s, 3H), 3.76 (t, *J*=6 Hz, 2H), 4.13 (t, *J*=6 Hz, 2H), 7.14 (s, 1H), 7.99 (s, 1H). <sup>13</sup>C NMR (50 MHz, CDCl<sub>3</sub>): δ 16.04, 46.21, 49.52, 119.23, 124.82, 139.04, 145.85, 157.00, 162.93. IR (KBr): 1676, 2108 cm<sup>-1</sup>. HRMS (ESI) *m/z* calculated for [C<sub>9</sub>H<sub>9</sub>ON<sub>5</sub>S + H]: 236.0601, found: 236.0598. Melting Point: 106°C.

### **3-(2-Azidoethyl)-6-ethylthieno[2,3-d]pyrimidin-4(3H)-one (29b)**

<sup>1</sup>H NMR (400 MHz, CDCl<sub>3</sub>): δ 1.36 (t, *J*=8 Hz, 3H), 2.89 (q, *J*=8 Hz, 2H), 3.76 (t, *J*=6 Hz, 2H), 4.13 (t, *J*=6 Hz, 2H), 7.17 (s, 1H), 7.94 (s, 1H). <sup>13</sup>C NMR (100 MHz, CDCl<sub>3</sub>): δ 15.25, 23.99, 46.20, 49.50, 117.36, 124.55, 145.76, 146.47, 157.15, 162.67. IR (CHCl<sub>3</sub>): 1670, 2105 cm<sup>-1</sup>. MS *m/z*: 250.1 [M+ H]. Melting Point: 78°C.

### **3-(2-Azidoethyl)-6-butylthieno[2,3-d]pyrimidin-4(3H)-one (29c)**

<sup>1</sup>H NMR (200 MHz, CDCl<sub>3</sub>): δ 0.95 (t, *J*=7 Hz, 3H), 1.30-1.52 (m, 2H), 1.61-1.80 (m, 2H), 2.85 (t, *J*=8 Hz, 2H), 3.76 (t, *J*=7 Hz, 2H), 4.12 (t, *J*=7 Hz, 2H), 7.15 (s, 1H), 7.94 (s, 1H). <sup>13</sup>C NMR (100 MHz, CDCl<sub>3</sub>): δ 13.63, 21.93, 30.21, 33.02, 46.10, 49.43, 117.97, 124.45, 144.93, 145.71, 157.04, 162.62. IR (CHCl<sub>3</sub>): 1682, 2104 cm<sup>-1</sup>. HRMS (ESI) *m/z* calculated for [C<sub>12</sub>H<sub>15</sub>ON<sub>5</sub>S + H]: 278.1070, found: 278.1064; [C<sub>12</sub>H<sub>15</sub>ON<sub>5</sub>S + Na]: 300.0890, found: 300.0883. Melting Point: 67°C.

### **3-(2-Azidoethyl)-6-hexylthieno[2,3-d]pyrimidin-4(3H)-one (29d)**

<sup>1</sup>H NMR (200 MHz, CDCl<sub>3</sub>): δ 0.88 (t, *J*=7 Hz, 3H), 1.22-1.45 (m, 6H), 1.65-1.76 (m, 2H), 2.84 (t, *J*=8 Hz, 2H), 3.76 (t, *J*=6 Hz, 2H), 4.12 (t, *J*=6 Hz, 2H), 7.14 (s, 1H), 7.94 (s, 1H). <sup>13</sup>C NMR (100 MHz, CDCl<sub>3</sub>): δ 13.99, 22.47, 28.55, 30.58, 30.96, 31.42, 46.15, 49.46, 118.01, 124.50, 145.06, 145.71,

157.11, 162.67. IR (CHCl<sub>3</sub>): 1674, 2106 cm<sup>-1</sup>. HRMS (ESI) m/z calculated for [C<sub>14</sub>H<sub>19</sub>ON<sub>5</sub>S + H]: 306.1383, found: 306.1378; [C<sub>14</sub>H<sub>19</sub>ON<sub>5</sub>S + Na]: 328.1203 found: 328.1197. Melting Point: 50°C.

### **3-(2-Azidoethyl)-6-heptylthieno[2,3-d]pyrimidin-4(3H)-one (29e)**

<sup>1</sup>H NMR (200 MHz, CDCl<sub>3</sub>): δ 0.88 (t, *J*=7 Hz, 3H), 1.19-1.45 (m, 8H), 1.62-1.82 (m, 2H), 2.84 (t, *J*=7 Hz, 2H), 3.76 (t, *J*=6 Hz, 2H), 4.12 (t, *J*=6 Hz, 2H), 7.15 (s, 1H), 7.94 (s, 1H). <sup>13</sup>C NMR (50 MHz, CDCl<sub>3</sub>): δ 13.94, 22.49, 28.79, 28.83, 30.52, 30.94, 31.58, 46.09, 49.43, 117.95, 124.47, 144.99, 145.70, 157.02, 162.55. IR (CHCl<sub>3</sub>): 1676, 2122 cm<sup>-1</sup>. HRMS (ESI) m/z calculated for [C<sub>15</sub>H<sub>21</sub>ON<sub>5</sub>S + H]: 320.1540, found: 320.1537; [C<sub>15</sub>H<sub>21</sub>ON<sub>5</sub>S + Na]: 342.1359, found: 342.1354. Melting Point: 50°C.

### **3-(3-Azidopropyl)-6-propylthieno[2,3-d]pyrimidin-4(3H)-one (30a)**

<sup>1</sup>H NMR (200 MHz, CDCl<sub>3</sub>): δ 0.96(t, *J*=7 Hz, 3H), 1.60-1.84 (m, 2H), 1.94-2.15 (m, 2H), 2.79(t, *J*=7 Hz, 2H), 3.38 (t, *J*=7 Hz, 2H), 4.07 (t, *J*=7 Hz, 2H), 7.11 (s, 1H), 7.93 (s, 1H). <sup>13</sup>C NMR (50 MHz, CDCl<sub>3</sub>): δ 13.26, 24.05, 28.03, 32.32, 43.98, 48.01, 117.95, 124.45, 144.31, 145.42, 156.96, 162.23. IR (CHCl<sub>3</sub>): 1669, 2101 cm<sup>-1</sup>. HRMS (ESI) m/z calculated for [C<sub>12</sub>H<sub>15</sub>ON<sub>5</sub>S + H]: 278.1070, found: 278.1066; [C<sub>12</sub>H<sub>15</sub>ON<sub>5</sub>S + Na]: 300.0890, found: 300.0884. Melting Point: 60°C.

### **3-(3-Azidopropyl)-6-butylthieno[2,3-d]pyrimidin-4(3H)-one (30b)**

<sup>1</sup>H NMR (200 MHz, CDCl<sub>3</sub>): δ 0.95 (t, *J*=7 Hz, 3H), 1.32-1.52 (m, 2H), 1.60-1.80 (m, 2H), 1.98-2.16 (m, 2H), 2.85 (t, *J*=7 Hz, 2H), 3.42 (t, *J*=7 Hz, 2H), 4.10 (t, *J*=7 Hz, 2H), 7.15 (s, 1H), 7.95 (s, 1H). <sup>13</sup>C NMR (50 MHz, CDCl<sub>3</sub>): δ 13.65, 21.94, 28.20, 30.23, 33.04, 44.19, 48.16, 118.04, 124.68, 144.87, 145.48, 157.19, 162.41. IR (CHCl<sub>3</sub>): 1673, 2101 cm<sup>-1</sup>. HRMS (ESI) m/z calculated for [C<sub>13</sub>H<sub>17</sub>ON<sub>5</sub>S + H]: 292.1227, found: 292.1224; [C<sub>13</sub>H<sub>17</sub>ON<sub>5</sub>S + Na]: 314.1046 found: 314.1042. Melting Point: 51°C.

### **3-(3-Azidopropyl)-6-heptylthieno[2,3-d]pyrimidin-4(3H)-one (30c)**

<sup>1</sup>H NMR (200 MHz, CDCl<sub>3</sub>): δ 0.87 (t, *J*=7 Hz, 3H), 1.15-1.38 (m, 8H), 1.60-1.79 (m, 2H), 1.98-2.13 (m, 2H), 2.82 (t, *J*=7 Hz, 2H), 3.40 (t, *J*=7 Hz, 2H), 4.08 (t, *J*=7 Hz, 2H), 7.13 (s, 1H), 7.94 (s, 1H). <sup>13</sup>C NMR (50 MHz, CDCl<sub>3</sub>): δ 14.00, 22.54, 28.22, 28.83, 28.88, 30.56, 30.98, 31.63, 44.20, 48.18, 118.05, 124.70, 144.95, 145.48, 157.21, 162.43. IR (CHCl<sub>3</sub>): 1674, 2101 cm<sup>-1</sup>. HRMS (ESI) m/z calculated for [C<sub>16</sub>H<sub>23</sub>ON<sub>5</sub>S + H]: 334.1696, found: 334.1692; [C<sub>16</sub>H<sub>23</sub>ON<sub>5</sub>S + Na]: 356.1516, found: 356.1509. Melting Point: 52°C.

### **3-(3-Azidopropyl)-5,6,7,8-tetrahydrobenzo[4,5]thieno[2,3-d]pyrimidin-4(3H)-one (30d)**

<sup>1</sup>H NMR (200 MHz, CDCl<sub>3</sub>): δ 1.79-1.95 (m, 4H), 2.02-2.12 (m, 2H), 2.79 (t, *J*=6 Hz, 2H), 3.02 (t, *J*=6 Hz, 2H), 3.41 (t, *J*=6 Hz, 2H), 4.06 (t, *J*=6 Hz, 2H), 7.90 (s, 1H). <sup>13</sup>C NMR (50 MHz, CDCl<sub>3</sub>): δ 22.14, 22.76, 25.14, 25.54, 28.22, 43.94, 48.26, 122.67, 131.44, 134.29, 145.53, 157.69, 162.06. IR (CHCl<sub>3</sub>): 1668, 2102 cm<sup>-1</sup>. HRMS (ESI) m/z calculated for [C<sub>13</sub>H<sub>15</sub>ON<sub>5</sub>S + H]: 290.1070, found: 290.1064; [C<sub>13</sub>H<sub>15</sub>ON<sub>5</sub>S + Na]: 312.0890, found: 312.0883. Melting point: 70.5 °C.

### **6-Ethyl-3-(2-(4-(hydroxymethyl)-1H-1,2,3-triazol-1-yl)ethyl)thieno[2,3-d]pyrimidin-4(3H)-one (31a)**

<sup>1</sup>H NMR (200 MHz, CDCl<sub>3</sub>): δ 1.35 (t, *J*=8 Hz, 3H), 2.88 (q, *J*=8 Hz, 2H), 4.55 (t, *J*=6 Hz, 2H), 4.73 (bs, 2H), 4.79 (t, *J*=6 Hz, 2H), 7.16 (s, 1H), 7.42 (s, 1H), 7.50 (s, 1H). <sup>13</sup>C NMR (100 MHz, MeOH-d<sub>4</sub>): δ 15.98, 24.94, 48.15, 49.79, 56.56, 118.39, 124.90, 125.55, 147.81, 148.27, 149.71, 159.13, 164.08. IR

(KBr): 1681, 3394  $\text{cm}^{-1}$ . HRMS (ESI)  $m/z$  calculated for  $[\text{C}_{13}\text{H}_{15}\text{N}_5\text{O}_2\text{S}+\text{H}]$ : 306.1019, found: 306.1016;  $[\text{C}_{13}\text{H}_{15}\text{N}_5\text{O}_2\text{S} + \text{Na}]$ : 328.0839, found: 328.0835. Melting Point: 158 $^{\circ}\text{C}$ .

### **1-(2-(6-Ethyl-4-oxothieno[2,3-d]pyrimidin-3(4H)-yl)ethyl)-1H-1,2,3-triazole-4-carbaldehyde (31b)**

$^1\text{H}$  NMR (500 MHz,  $\text{CDCl}_3$ ):  $\delta$  1.37(t,  $J=7$  Hz, 3H), 2.89 (q,  $J=7$  Hz, 2H), 4.60 (t,  $J=7$  Hz, 2H), 4.90 (t,  $J=7$  Hz, 2H), 7.17 (s, 1H), 7.54 (s, 1H), 7.97 (s, 1H), 10.11 (s, 1H).  $^{13}\text{C}$  NMR (125 MHz,  $\text{CDCl}_3$ ):  $\delta$  15.22, 24.01, 46.87, 48.47, 117.22, 124.39, 126.29, 144.70, 147.26, 147.85, 157.17, 162.76, 184.63. IR ( $\text{CHCl}_3$ ): 1643 (broad)  $\text{cm}^{-1}$ . MS  $m/z$ : 304.1  $[\text{M}+\text{H}]$ . Melting Point: 188 $^{\circ}\text{C}$ .

### **6-Methyl-3-(prop-2-yn-1-yl)thieno[2,3-d]pyrimidin-4(3H)-one (32a)**

$^1\text{H}$  NMR (200 MHz,  $\text{CDCl}_3$ ):  $\delta$  2.52 (t,  $J=2$  Hz, 1H), 2.55 (s, 3H), 4.81 (d,  $J=2$  Hz, 2H), 7.14 (s, 1H), 8.25 (s, 1H).  $^{13}\text{C}$  NMR (50 MHz,  $\text{CDCl}_3$ ):  $\delta$  15.94, 34.94, 75.34, 76.36, 119.22, 124.45, 139.02, 144.31, 156.24, 162.50. IR (Neat): 1665, 2120  $\text{cm}^{-1}$ . HRMS (ESI)  $m/z$  calculated for  $[\text{C}_{10}\text{H}_8\text{ON}_2\text{S}+\text{H}]$ : 205.0430, found: 205.0428. Melting Point: 141 $^{\circ}\text{C}$ .

### **6-Ethyl-3-(prop-2-yn-1-yl)thieno[2,3-d]pyrimidin-4(3H)-one (32b)**

$^1\text{H}$  NMR (200MHz,  $\text{CDCl}_3$ ):  $\delta$  1.35 (t,  $J=7$  Hz, 3H), 2.51 (t,  $J=3$  Hz, 1H), 2.80-2.97 (m, 2H), 4.81 (d,  $J=3$  Hz, 2H), 7.17 (s, 1H), 8.23 (s, 1H).  $^{13}\text{C}$  NMR (50 MHz,  $\text{CDCl}_3$ ):  $\delta$  15.10, 23.83, 34.90, 75.24, 76.37, 117.33, 124.16, 144.29, 146.35, 156.34, 162.20. IR ( $\text{CHCl}_3$ ): 1668, 2124  $\text{cm}^{-1}$ . MS  $m/z$ : 219.1  $[\text{M}+\text{H}]$ . Melting Point: 100  $^{\circ}\text{C}$ .

### **3-(Prop-2-yn-1-yl)-6-propylthieno[2,3-d]pyrimidin-4(3H)-one (32c)**

$^1\text{H}$  NMR (200 MHz,  $\text{CDCl}_3$ ):  $\delta$  0.99 (t,  $J=7$  Hz, 3H), 1.74 (q,  $J=7$  Hz, 2H), 2.51 (t,  $J=2$  Hz, 1H), 2.82 (t,  $J=7$  Hz, 2H), 4.81 (d,  $J=2$  Hz, 2H), 7.17 (s, 1H), 8.25 (s, 1H).  $^{13}\text{C}$  NMR (100 MHz,  $\text{CDCl}_3$ ):  $\delta$  13.39, 24.16, 32.45, 34.93, 75.26, 76.57, 118.15, 124.16, 144.28, 144.71, 156.35, 162.24. IR (Neat): 1664, 2123  $\text{cm}^{-1}$ . HRMS (ESI)  $m/z$  calculated for  $[\text{C}_{12}\text{H}_{12}\text{ON}_2\text{S}+\text{H}]$ : 233.0743, found: 233.0740;  $[\text{C}_{12}\text{H}_{12}\text{ON}_2\text{S}+\text{Na}]$ : 255.0563, found: 255.0558. Melting Point: 103 $^{\circ}\text{C}$ .

### **6-Butyl-3-(prop-2-yn-1-yl)thieno[2,3-d]pyrimidin-4(3H)-one (32d)**

$^1\text{H}$  NMR (200 MHz,  $\text{CDCl}_3$ ):  $\delta$  0.95 (t,  $J=7$  Hz, 3H), 1.30-1.50 (m, 2H), 1.60-1.80 (m, 2H), 2.51 (t,  $J=3$  Hz, 1H), 2.85 (t,  $J=8$  Hz, 2H), 4.81(d,  $J=3$  Hz, 2H), 7.17 (s, 1H), 8.23 (s, 1H).  $^{13}\text{C}$  NMR (50 MHz,  $\text{CDCl}_3$ ):  $\delta$  13.63, 21.92, 30.21, 33.01, 34.96, 75.31, 76.37, 118.12, 124.24, 144.27, 145.03, 156.43, 162.33. IR ( $\text{CHCl}_3$ ): 1678, 2123, 3306  $\text{cm}^{-1}$ . HRMS (ESI)  $m/z$  calculated for  $[\text{C}_{13}\text{H}_{14}\text{ON}_2\text{S} + \text{H}]$ : 247.0900, found: 247.0898. Melting Point: 89 $^{\circ}\text{C}$ .

### **6-Pentyl-3-(prop-2-yn-1-yl)thieno[2,3-d]pyrimidin-4(3H)-one (32e)**

$^1\text{H}$  NMR (400 MHz,  $\text{CDCl}_3$ )  $\delta$ : 0.90 (t,  $J=7$  Hz, 3H), 1.28-1.38 (m, 4H), 1.66-1.74 (m, 2H), 2.51 (t,  $J=2$  Hz, 1H), 2.84 (t,  $J=7$  Hz, 2H), 4.82 (s, 2H), 7.16 (s, 1H), 8.23 (s, 1H).  $^{13}\text{C}$  NMR (100 MHz,  $\text{CDCl}_3$ ):  $\delta$  13.93, 22.31, 30.58, 30.70, 31.05, 35.02, 75.40, 76.50, 118.22, 124.33, 144.28, 145.19, 156.53, 162.41. IR ( $\text{CHCl}_3$ ): 1677, 2124  $\text{cm}^{-1}$ . HRMS (ESI)  $m/z$  calculated for  $[\text{C}_{14}\text{H}_{16}\text{ON}_2\text{S} + \text{H}]$ : 261.1056, found: 261.1053. Melting Point: 100 $^{\circ}\text{C}$ .

### **6-Heptyl-3-(prop-2-yn-1-yl)thieno[2,3-d]pyrimidin-4(3H)-one (32f)**

<sup>1</sup>H NMR (200 MHz, CDCl<sub>3</sub>): δ 0.89 (t, *J*=7 Hz, 3H), 1.16-1.46 (m, 8H), 1.61-1.81 (m, 2H), 2.52 (t, *J*=3 Hz, 1H), 2.85 (t, *J*=7 Hz, 2H), 4.82 (d, *J*=3 Hz, 2H), 7.17 (s, 1H), 8.28 (s, 1H). <sup>13</sup>C NMR (50 MHz, CDCl<sub>3</sub>): δ 13.98, 22.53, 28.82, 28.86, 30.56, 30.97, 31.62, 35.01, 75.36, 76.37, 118.16, 124.29, 144.31, 145.14, 156.44, 162.29. IR (KBr): 1675, 2122, 3305 cm<sup>-1</sup> MS *m/z* : 289.2 [M<sup>+</sup> H]. Melting Point: 103°C.

### **3-(Prop-2-yn-1-yl)-5,6,7,8-tetrahydrobenzo[4,5]thieno[2,3-d]pyrimidin-4(3H)-one (32g)**

<sup>1</sup>H NMR (200 MHz, CDCl<sub>3</sub>): δ 1.79-2.01(m, 4H), 2.49 (t, *J*=3 Hz, 1H), 2.78 (t, *J*=6 Hz, 2H), 3.02 (t, *J*=6 Hz, 2H), 4.78 (d, *J*=3 Hz, 2H), 8.17 (s, 1H). <sup>13</sup>C NMR (50 MHz, CDCl<sub>3</sub>): δ 22.08, 22.72, 25.11, 25.45, 34.64, 75.08, 76.56, 122.27, 131.50, 134.48, 144.13, 156.89, 161.94. IR (KBr): 1673, 2358, 3305 cm<sup>-1</sup>. HRMS (ESI) *m/z* calculated for [C<sub>13</sub>H<sub>12</sub>ON<sub>2</sub>S + H]: 245.0743, found: 245.0739; [C<sub>13</sub>H<sub>12</sub>ON<sub>2</sub>S + Na]: 267.0563, found: 267.0556. Melting Point: 115.6 °C

### **6-Ethyl-3-((1-(2-(6-methyl-4-oxothieno[2,3-d]pyrimidin-3(4H)-yl)ethyl)-1H-1,2,3-triazol-4-yl)methyl)thieno[2,3-d]pyrimidin-4(3H)-one (33a)**

<sup>1</sup>H NMR (200 MHz, CDCl<sub>3</sub>+DMSO<sub>d</sub><sub>6</sub>): δ 0.91 (t, *J*=7 Hz, 3H), 2.10 (s, 1H), 2.45(q, *J*=7 Hz, 2H), 4.06(t, *J*=5Hz, 2H), 4.33(t, *J*=5Hz, 2H), 6.63(s, 1H), 6.65(s, 1H), 7.26(s, 1H), 7.51(s, 1H), 7.86(s, 1H). <sup>13</sup>C NMR (50 MHz, CDCl<sub>3</sub>+DMSO<sub>d</sub><sub>6</sub>): δ 14.23, 14.84, 22.72, 39.91, 45.24, 46.94, 116.23, 117.97, 123.26, 123.31, 123.70, 137.45, 141.33, 141.41, 144.84, 145.00, 155.57, 155.63, 161.24, 161.60. IR (CHCl<sub>3</sub>): 1670 cm<sup>-1</sup>. HRMS (ESI) *m/z* calculated for [C<sub>20</sub>H<sub>19</sub>O<sub>2</sub>N<sub>7</sub>S<sub>2</sub> + H]: 454.1114, found: 454.1103. Melting Point: 162°C.

### **6-Hexyl-3-(2-(4-((4-oxo-6-propylthieno[2,3-d]pyrimidin-3(4H)-yl)methyl)-1H-1,2,3-triazol-1-yl)ethyl)thieno[2,3-d]pyrimidin-4(3H)-one (33b)**

<sup>1</sup>H NMR (200 MHz, CDCl<sub>3</sub>): δ 0.84-1.04 (m, 6H), 1.17-1.48 (m, 6H), 1.61-1.87 (m, 4H), 2.81 (t, *J*=7 Hz, 4H), 4.52 (t, *J*=6 Hz, 2H), 4.74 (t, *J*=6Hz, 2H), 5.21 (s, 2H), 7.09 (s, 1H), 7.14 (s, 1H), 7.48 (s, 1H), 7.63 (s, 1H), 8.22 (s, 1H). <sup>13</sup>C NMR (125MHz, CDCl<sub>3</sub>): δ 13.49, 14.00, 22.48, 24.27, 28.62, 30.61, 30.96, 31.44, 32.61, 41.46, 46.77, 48.18, 117.92, 118.08, 124.39, 124.51, 125.08, 142.60, 144.76, 144.91, 145.29, 145.44, 157.03, 157.08, 162.67, 162.73. IR (CHCl<sub>3</sub>): 1673 cm<sup>-1</sup>. HRMS (ESI) *m/z* calculated for [C<sub>26</sub>H<sub>32</sub>O<sub>2</sub>N<sub>7</sub>S<sub>2</sub> + H]: 538.2053, found: 538.2043. Melting Point: 141°C.

### **6-Heptyl-3-((1-(2-(6-heptyl-4-oxothieno[2,3-d]pyrimidin-3(4H)-yl)ethyl)-1H-1,2,3-triazol-4-yl)methyl)thieno[2,3-d]pyrimidin-4(3H)-one (33c)**

<sup>1</sup>H NMR (200 MHz, CDCl<sub>3</sub>): δ 0.89 (t, *J*=7 Hz, 6H), 1.11-1.50 (m, 16H), 1.52-1.82 (m, 4H), 2.17(s, 1H), 2.83 (t, *J*=7 Hz, 4H), 4.52 (t, *J*=8 Hz, 2H), 4.74 (t, *J*=8 Hz, 2H), 5.21 (s, 2H), 7.09 (s, 1H), 7.14 (s, 1H), 7.48 (s, 1H), 7.64 (s, 1H). <sup>13</sup>C NMR (50 MHz, CDCl<sub>3</sub>): δ 14.03(2C), 22.56(2C), 28.90(4C), 30.56(2C), 30.99(2C), 31.65(2C), 41.46, 46.76, 48.15, 117.89(2C), 124.45, 125.10, 128.37, 131.13, F 144.91, 145.07, 145.25, 145.42, 157.05(2C), 162.64(2C). IR (KBr): 1667, 1679, 2359, 3433 cm<sup>-1</sup> MS *m/z* : 608.3 [M<sup>+</sup> H]. Melting point: 159 °C.

### **3-((1-(2-(6-Heptyl-4-oxothieno[2,3-d]pyrimidin-3(4H)-yl)ethyl)-1H-1,2,3-triazol-4-yl)methyl)-5,6,7,8-tetrahydrobenzo[4,5]thieno[2,3-d]pyrimidin-4(3H)-one (33d)**

<sup>1</sup>H NMR (200 MHz, CDCl<sub>3</sub>): δ 0.89 (t, *J*=7 Hz, 3H), 1.24-1.35 (m, 6H), 1.4-1.85 (m, 8H), 2.77-2.97 (m, 6H), 4.52 (t, *J*=6 Hz, 2H), 4.74 (t, *J*=6 Hz, 2H), 5.17 (s, 2H), 7.14 (s, 1H), 7.47 (s, 1H), 7.62 (s, 1H), 8.17 (s, 1H). <sup>13</sup>C NMR (50 MHz, CDCl<sub>3</sub>): δ 14.02, 22.16, 22.56, 22.77, 25.16, 25.55, 28.89(2C), 30.58, 30.98, 31.65, 41.17, 46.79, 48.15, 117.87, 122.51, 124.34, 125.07, 131.34, 134.45, 143.00(2C), 144.12,

145.43, 157.06, 157.50, 162.30, 162.63. IR (KBr): 1567, 1677, 3362  $\text{cm}^{-1}$ . HRMS (ESI)  $m/z$  calculated for  $[\text{C}_{28}\text{H}_{33}\text{O}_2\text{N}_7\text{S}_2 + \text{H}]$ : 564.2210, found: 564.2194. Melting point: 150°C

**6-Butyl-3-(3-(4-((6-butyl-4-oxothieno[2,3-d]pyrimidin-3(4H)-yl)methyl)-1H-1,2,3-triazol-1-yl)propyl)thieno[2,3-d]pyrimidin-4(3H)-one (34a)**

$^1\text{H}$  NMR (500 MHz,  $\text{CDCl}_3$ ):  $\delta$  0.91-0.97 (m, 6H), 1.35-1.47 (m, 4H), 1.64-1.75 (m, 4H), 2.37-2.47 (m, 2H), 2.79-2.88 (m, 4H), 4.06 (t,  $J=7$  Hz, 2H), 4.39 (t,  $J=7$  Hz, 2H), 5.26 (s, 2H), 7.12 (s, 1H), 7.14 (s, 1H), 7.85 (s, 1H), 7.98 (s, 1H), 8.26 (s, 1H).  $^{13}\text{C}$  NMR (125 MHz,  $\text{CDCl}_3$ ):  $\delta$  13.68 (2C), 22.00 (2C), 29.68, 30.29 (2C), 33.09 (2C), 41.58, 43.96, 47.26, 117.98, 118.07, 124.25, 124.60, 124.69, 128.82, 145.06, 145.14, 145.41, 145.48, 157.11, 157.35, 162.58, 162.71. IR ( $\text{CHCl}_3$ ): 1668  $\text{cm}^{-1}$ . HRMS (ESI)  $m/z$  calculated for  $[\text{C}_{26}\text{H}_{31}\text{O}_2\text{N}_7\text{S}_2 + \text{H}]$ : 538.2053, found: 538.2049. Melting Point: 173 °C.

**3-(3-(4-((6-Heptyl-4-oxothieno[2,3-d]pyrimidin-3(4H)-yl)methyl)-1H-1,2,3-triazol-1-yl)propyl)-5,6,7,8-tetrahydrobenzo[4,5]thieno[2,3-d]pyrimidin-4(3H)-one (34b)**

$^1\text{H}$  NMR (200 MHz,  $\text{CDCl}_3$ ):  $\delta$  0.87 (t,  $J=7$  Hz, 3H), 1.14-1.33 (m, 8H), 1.55-1.95 (m, 6H), 2.40 (quin,  $J=8$  Hz, 2H), 2.68-2.86 (m, 4H), 3.00 (t, 2H), 4.03 (t,  $J=7$  Hz, 2H), 4.39 (t,  $J=7$  Hz, 2H), 5.26 (s, 2H), 7.12 (s, 1H), 7.84 (s, 1H), 7.93 (s, 1H), 8.26 (s, 1H).  $^{13}\text{C}$  NMR (50 MHz,  $\text{CDCl}_3$ ):  $\delta$  14.01, 22.16, 22.54, 22.78, 25.17, 25.58, 28.87(2C), 29.63, 30.56, 30.99, 31.63, 41.54, 43.70, 47.29, 117.88 (2C), 124.18, 124.49, 131.43, 134.55, 145.09(2C), 145.33, 145.37, 157.08, 157.83, 162.17, 162.64. IR (KBr): 1669, 3122  $\text{cm}^{-1}$ . HRMS (ESI)  $m/z$  calculated for  $[\text{C}_{29}\text{H}_{35}\text{O}_2\text{N}_7\text{S}_2 + \text{H}]$ : 578.2366, found: 578.2531;  $[\text{C}_{29}\text{H}_{35}\text{O}_2\text{N}_7\text{S}_2 + \text{Na}]$ : 600.2186, found: 600.2355. . Melting point: 157.2 °C.

**3-(3-(4-((4-Oxo-5,6,7,8-tetrahydrobenzo[4,5]thieno[2,3-d]pyrimidin-3(4H)-yl)methyl)-1H-1,2,3-triazol-1-yl)propyl)-5,6,7,8-tetrahydrobenzo[4,5]thieno[2,3-d]pyrimidin-4(3H)-one (34c)**

$^1\text{H}$  NMR (200 MHz,  $\text{CDCl}_3$ ):  $\delta$  1.71-1.95 (m, 8H), 2.25-2.60(m, 2H), 2.78 (t,  $J=6$  Hz, 4H), 3.00 (t,  $J=6$ Hz, 4H), 4.03 (t,  $J=6$ Hz, 2H), 4.40 (t,  $J=7$ Hz, 2H), 5.23 (s, 2H), 7.83 (s, 1H), 7.94 (s, 1H), 8.82 (s, 1H).  $^{13}\text{C}$  NMR (50 MHz,  $\text{CDCl}_3$ ):  $\delta$  22.15(2C), 22.77(2C), 25.16(2C), 25.57(2C), 29.60, 41.22, 43.71, 47.26, 122.62, 122.67, 124.11(2C), 131.33, 131.40, 134.44, 134.53, 145.30, 145.32, 157.56, 157.82, 162.16, 162.27. IR (KBr): 1668, 3017, 3422  $\text{cm}^{-1}$ . HRMS (ESI)  $m/z$  calculated for  $[\text{C}_{26}\text{H}_{27}\text{O}_2\text{N}_7\text{S}_2 + \text{Na}]$ : 556.1560, found: 556.1768. Melting point: 121.5°C.

**3,3'-(Ethane-1,2-diyl)bis(6-butylthieno[2,3-d]pyrimidin-4(3H)-one) (35a)**

$^1\text{H}$  NMR (200 MHz,  $\text{CDCl}_3$ ):  $\delta$  0.96 (t,  $J=8$  Hz, 6H), 1.32-1.50 (m, 4H), 1.64-1.81 (m, 4H), 2.86 (t,  $J=8$  Hz, 4H), 4.43 (s, 4H), 7.17 (s, 2H), 7.68 (s, 2H).  $^{13}\text{C}$  NMR (125 MHz,  $\text{CDCl}_3$ ):  $\delta$  13.69 (2C), 22.03 (2C), 30.32 (2C), 33.07 (2C), 45.51, 45.61, 117.94 (2C), 124.42 (2C), 145.16, 145.30, 145.56, 145.61, 157.30 (2C), 162.43, 162.63. IR ( $\text{CHCl}_3$ ): 1674  $\text{cm}^{-1}$ . HRMS (ESI)  $m/z$  calculated for  $[\text{C}_{22}\text{H}_{26}\text{O}_2\text{N}_4\text{S}_2 + \text{H}]$ : 443.1570, found: 443.1571;  $[\text{C}_{22}\text{H}_{26}\text{O}_2\text{N}_4\text{S}_2 + \text{Na}]$ : 465.1389 found: 465.1389. Melting Point: 207°C.

**3,3'-(Ethane-1,2-diyl)bis(6-propylthieno[2,3-d]pyrimidin-4(3H)-one) (35c)**

$^1\text{H}$  NMR (200 MHz,  $\text{CDCl}_3$ ):  $\delta$  1.01 (t,  $J=7$  Hz, 6H), 1.65-1.85 (m, 4H), 2.83 (t,  $J=7$  Hz, 4H), 4.42 (s, 4H), 7.16 (s, 2H), 7.69 (s, 2H).  $^{13}\text{C}$  NMR (50 MHz,  $\text{CDCl}_3$ ):  $\delta$  13.54 (2C), 24.27 (2C), 32.64 (2C), 45.48 (2C), 118.03 (2C), 124.40 (2C), 145.12 (2C), 145.29 (2C), 157.35 (2C), 162.86 (2C). IR ( $\text{CHCl}_3$ ): 1660  $\text{cm}^{-1}$ . HRMS (ESI)  $m/z$  calculated for  $[\text{C}_{20}\text{H}_{22}\text{O}_2\text{N}_4\text{S}_2 + \text{H}]$ : 415.1257, found: 415.1238. Melting Point: 217°C.

**6-Butyl-3-(2-((6-butylthieno[2,3-d]pyrimidin-4-yl)oxy)ethyl)thieno[2,3-d]pyrimidin-4(3H)-one (36a)**

<sup>1</sup>H NMR (200 MHz, CDCl<sub>3</sub>): δ 0.89-1.00 (m, 6H), 1.34-1.47 (m, 4H), 1.65-1.76 (m, 4H), 2.84 (t, *J*=8 Hz, 2H), 2.90 (t, *J*=8 Hz, 2H), 4.49 (t, *J*=5 Hz, 2H), 4.85 (t, *J*=5 Hz, 2H), 6.94 (s, 1H), 7.17 (s, 1H), 8.00 (s, 1H), 8.51 (s, 1H). <sup>13</sup>C NMR (50 MHz, CDCl<sub>3</sub>): δ 13.70, 13.74, 21.98, 22.13, 30.27, 30.67, 33.07, 33.09, 45.90, 63.79, 114.04, 118.16, 119.34, 124.70, 144.84, 145.90, 146.32, 152.04, 157.18, 161.72, 162.49, 168.27 IR (CHCl<sub>3</sub>): 1669 cm<sup>-1</sup>. HRMS (ESI) *m/z* calculated for [C<sub>22</sub>H<sub>26</sub>O<sub>2</sub>N<sub>4</sub>S<sub>2</sub> + H]: 443.1570, found: 443.1588; [C<sub>22</sub>H<sub>26</sub>O<sub>2</sub>N<sub>4</sub>S<sub>2</sub> + Na]: 465.1389, found: 465.1409. Melting Point: 176°C.

### 3-(2-Bromoethyl-6-ethylthieno[2,3-*d*]primidin-4(3*H*)-one (36b):

<sup>1</sup>H NMR (200 MHz, CDCl<sub>3</sub>): δ 1.36 (t, *J*=7 Hz, 3H), 2.89 (q, *J*=7 Hz, 2H), 3.77 (t, *J*=6 Hz, 2H), 4.38 (t, *J*=6 Hz, 2H), 7.18 (s, 1H), 7.99 (s, 1H). <sup>13</sup>C NMR (50 MHz, CDCl<sub>3</sub>): δ 15.29, 24.01, 29.82, 48.75, 117.38, 124.58, 145.80, 146.46, 157.06, 162.74. IR (CHCl<sub>3</sub>): 1676 cm<sup>-1</sup>. HRMS (ESI) *m/z* calculated for [C<sub>10</sub>H<sub>11</sub>OBrN<sub>2</sub>S+H]: 286.9848, found: 286.9842. Melting Point: 196°C.

### 2-(2-(6-Butyl-4-oxothieno[2,3-*d*]pyrimidin-3(4*H*)-yl)ethyl)isoindoline-1,3-dione (37a)

<sup>1</sup>H NMR (200 MHz, CDCl<sub>3</sub>): δ 0.95 (t, *J*=7 Hz, 3H), 1.30-1.52 (m, 2H), 1.58-1.80 (m, 2H), 2.83 (t, *J*=7 Hz, 2H), 4.14 (t, *J*=6 Hz, 2H), 4.33 (t, *J*=6 Hz, 2H), 7.14 (s, 1H), 7.66-7.92 (m, 5H). <sup>13</sup>C NMR (100 MHz, CDCl<sub>3</sub>): δ 13.71, 22.06, 30.29, 33.02, 36.69, 45.36, 118.22, 123.58(2C), 124.62, 131.63, 131.63, 134.27(2C), 144.84, 144.98, 157.22, 162.35, 167.98(2C). IR (CHCl<sub>3</sub>): 1676, 1716 cm<sup>-1</sup>. MS *m/z*: 382.1 [M+ H]. Melting Point: 139°C.

### 2-(3-(6-Butyl-4-oxothieno[2,3-*d*]pyrimidin-3(4*H*)-yl)propyl)isoindoline-1,3-dione (38a)

<sup>1</sup>H NMR (200MHz, CDCl<sub>3</sub>): δ 0.94 (t, *J*=7 Hz, 3H), 1.30-1.51(m, 2H), 1.61-1.79 (m,2H), 2.11-2.29 (m, 2H), 2.84 (t, *J*=8 Hz, 2H), 3.80 (t, *J*=7 Hz, 2H), 4.06 (t, *J*=7 Hz, 2H), 7.12 (s, 1H), 7.69-7.79 (m, 2H), 7.80-7.91(m, 2H), 8.07 (s, 1H). <sup>13</sup>C NMR (50MHz, CDCl<sub>3</sub>): δ 13.64, 21.92, 28.51, 30.19, 33.01, 35.10, 44.66, 118.05, 123.28 (2C), 124.64, 131.81(2C), 134.03 (2C), 144.62, 145.63, 157.11, 162.38, 168.25 (2C). IR (CHCl<sub>3</sub>): 1714, 1773 cm<sup>-1</sup> HRMS (ESI) *m/z* calculated for [C<sub>21</sub>H<sub>21</sub>O<sub>3</sub>N<sub>3</sub>S + H]: 396.1376, found: 396.1373; [C<sub>21</sub>H<sub>21</sub>O<sub>3</sub>N<sub>3</sub>S + Na]: 418.1196, found: 418.1190. Melting Point: 146°C.

### Primary antitubercular screening results against MTB H37Ra and M. bovis BCG (% inhibition)

| Compound no | Mycobacterium tuberculosis H37Ra |              |         | Mycobacterium bovis BCG |              |             |
|-------------|----------------------------------|--------------|---------|-------------------------|--------------|-------------|
|             | 30 µg/mL                         | 10 µg/mL     | 3 µg/mL | 30 µg/mL                | 10 µg/mL     | 3 µg/mL     |
| 11a         | 23.51                            | 28.95        | 13.88   | <b>34.0</b>             | <b>12.7</b>  | <b>-9.1</b> |
| 11b         | 37.67                            | 35.04        | 35.73   | <b>13.6</b>             | <b>18.1</b>  | <b>11.0</b> |
| 11c         | 57.16                            | 50.35        | 50.76   | <b>23.1</b>             | <b>3.9</b>   | <b>0.1</b>  |
| 11d         | 11.52                            | 5.45         | -5.71   | <b>-5.4</b>             | <b>-36.1</b> | <b>-8.0</b> |
| 11e         | -8.23                            | -1.95        | -1.00   | <b>-18.0</b>            | <b>-5.0</b>  | <b>-6.7</b> |
| 11f         | -9.04                            | -6.25        | -5.35   | <b>-11.9</b>            | <b>-31.5</b> | <b>-9.5</b> |
| 11g         | <b>88.22</b>                     | <b>84.76</b> | 71.65   | <b>98.2</b>             | <b>36.3</b>  | <b>3.5</b>  |
| 11h         | <b>86.60</b>                     | 51.35        | 36.58   | <b>101.1</b>            | <b>95.6</b>  | <b>29.4</b> |
| 11i         | 32.75                            | 23.74        | 2.78    | <b>21.7</b>             | <b>28.5</b>  | <b>-5.2</b> |
| 11j         | -3.06                            | 6.84         | -3.35   | <b>25.9</b>             | <b>-10.4</b> | <b>-5.0</b> |
| 11k         | 47.98                            | 32.09        | 26.32   | <b>100.4</b>            | <b>99.7</b>  | <b>71.1</b> |
| 11l         | 20.47                            | 25.34        | 1.62    | <b>84.0</b>             | <b>47.8</b>  | <b>16.2</b> |
| 11m         | <b>85.86</b>                     | 48.11        | 36.32   | <b>91.2</b>             | <b>91.6</b>  | <b>77.9</b> |
| 11n         | 24.72                            | 9.93         | 0.31    | <b>43.8</b>             | <b>17.6</b>  | <b>8.0</b>  |

|     |        |        |        |       |       |       |
|-----|--------|--------|--------|-------|-------|-------|
| 12a | 74.87  | 50.74  | 51.22  | 96.1  | 8.9   | 18.6  |
| 12b | 26.45  | 11.55  | 17.11  | 17.7  | 23.3  | -4.0  |
| 12c | -11.73 | -17.29 | 10.37  | 78.2  | 65.5  | 50.6  |
| 12d | 18.13  | 6.74   | 2.30   | 42.0  | 35.9  | 32.3  |
| 12e | 36.65  | 35.51  | 38.66  | 99.6  | 100.4 | 101.1 |
| 13a | 40.33  | 30.88  | 13.74  | 91.1  | -7.6  | -52.6 |
| 13b | 96.01  | 99.66  | 93.22  | 98.9  | 98.7  | 99.8  |
| 14a | 97.34  | 48.01  | 34.51  | 96.1  | 97.8  | 94.6  |
| 14b | 90.94  | 80.98  | 76.78  | 100.9 | 99.7  | 98.2  |
| 14c | 91.57  | 84.84  | 72.78  | 100.6 | 96.3  | 97.4  |
| 15a | 98.55  | 62.80  | 23.42  | 59.9  | 34.1  | 0.8   |
| 16a | 92.08  | 23.18  | 8.64   | 96.9  | 35.8  | 32.9  |
| 16b | 7.57   | 29.70  | 2.35   | 41.8  | 29.0  | 29.1  |
| 16c | 31.40  | 28.55  | 23.61  | 23.1  | 25.3  | 31.5  |
| 17a | -13.03 | 0.82   | 14.65  | 55.4  | 37.8  | 7.2   |
| 17b | 27.65  | 22.89  | 20.89  | 47.8  | 56.4  | 45.5  |
| 17c | 2.90   | -1.41  | 1.11   | 65.0  | 62.4  | 67.1  |
| 18a | 39.52  | 31.32  | 30.23  | 65.9  | 61.7  | 38.1  |
| 19a | 21.16  | 33.23  | -0.81  | 98.0  | 96.4  | 72.9  |
| 19b | -17.47 | 0.59   | -8.28  | -1.2  | -2.2  | -45.4 |
| 20b | 17.85  | -20.03 | -4.99  | 7.5   | -2.4  | -12.5 |
| 20c | -13.34 | 20.73  | 20.20  | -10.9 | -11.5 | -3.5  |
| 21b | 27.96  | 22.25  | 16.06  | 37.7  | 18.9  | 23.1  |
| 22a | -16.21 | 3.23   | 8.02   | 22.8  | -25.5 | 18.9  |
| 23a | 31.67  | 31.29  | 11.95  | 86.0  | 88.3  | 54.4  |
| 23b | 6.32   | 1.97   | 7.34   | 47.3  | 44.7  | 41.4  |
| 23c | 18.12  | 12.39  | 3.87   | 22.4  | 29.1  | 38.8  |
| 24a | 44.78  | 32.24  | 43.23  | 4.6   | 13.7  | 5.6   |
| 24b | 11.52  | -2.38  | -41.06 | 16.6  | 8.0   | -6.4  |
| 24c | -1.84  | 16.82  | 30.99  | -3.9  | 6.0   | -11.5 |
| 24d | -5.33  | 28.84  | 11.07  | -5.8  | -2.7  | 1.6   |
| 24e | 43.51  | 2.52   | 15.11  | 99.8  | 49.4  | 64.1  |
| 24f | 99.21  | 26.67  | 12.59  | 103.8 | 101.2 | 42.3  |
| 24g | 93.96  | 81.56  | 34.52  | 99.8  | 100.3 | 101.5 |
| 24h | 97.30  | 100.40 | 97.98  | 102.7 | 103.5 | 100.1 |
| 24i | 25.78  | 29.55  | -11.64 | 0.7   | 17.0  | 6.5   |
| 24j | 26.05  | -22.94 | -43.07 | -0.9  | 40.8  | 4.9   |
| 25a | 4.54   | -22.29 | 13.95  | 10.1  | 0.0   | 7.1   |
| 25b | 4.10   | 6.46   | 11.52  | 45.5  | 45.3  | -7.1  |
| 25c | 48.95  | 35.37  | 23.38  | 102.4 | 53.2  | 38.6  |
| 25d | 100.65 | 66.87  | 55.87  | 101.7 | 103.2 | 103.3 |
| 25e | 4.05   | 38.18  | 28.54  | -22.2 | 12.1  | -50.5 |
| 26a | 23.59  | 31.49  | 19.19  | -6.8  | -8.4  | -3.7  |
| 26b | 67.57  | 9.79   | 7.93   | 97.5  | 60.3  | 23.6  |
| 26c | 93.12  | 89.85  | 91.27  | 98.4  | 96.8  | 99.9  |
| 26d | -1.38  | -2.21  | 12.01  | -15.4 | -9.3  | -12.9 |
| 27a | -6.64  | -4.17  | -4.99  | 3.6   | 1.0   | 2.6   |
| 28a | 17.99  | 25.28  | 22.94  | 43.1  | 23.2  | 25.5  |
| 29a | 30.39  | 14.36  | -7.27  | -0.4  | -33.0 | -4.6  |
| 29b | 29.93  | 38.87  | 29.47  | 21.7  | 16.0  | -3.0  |

|     |              |              |              |              |              |               |
|-----|--------------|--------------|--------------|--------------|--------------|---------------|
| 29c | 73.69        | 26.55        | 33.63        | <b>97.4</b>  | <b>37.0</b>  | <b>22.8</b>   |
| 29d | <b>97.14</b> | <b>94.32</b> | 73.02        | <b>97.6</b>  | <b>97.0</b>  | <b>97.1</b>   |
| 29e | <b>98.45</b> | <b>96.91</b> | <b>91.69</b> | <b>100.4</b> | <b>100.6</b> | <b>100.2</b>  |
| 30a | 14.77        | 17.51        | 28.98        | <b>60.6</b>  | <b>22.5</b>  | <b>7.9</b>    |
| 30b | 46.69        | 21.14        | 19.05        | <b>100.6</b> | <b>78.8</b>  | <b>92.6</b>   |
| 30c | 82.47        | 74.07        | 70.62        | <b>97.3</b>  | <b>98.8</b>  | <b>96.5</b>   |
| 30d | 25.26        | 21.67        | 19.10        | <b>81.4</b>  | <b>27.1</b>  | <b>6.0</b>    |
| 31a | 43.83        | 45.76        | 31.05        | <b>17.4</b>  | <b>-11.9</b> | <b>11.6</b>   |
| 31b | 26.70        | -0.80        | -13.65       | <b>-13.6</b> | <b>55.8</b>  | <b>13.2</b>   |
| 32a | -8.42        | -2.19        | -3.65        | <b>-0.8</b>  | <b>12.4</b>  | <b>2.1</b>    |
| 32b | 30.70        | -9.33        | -2.32        | <b>26.9</b>  | <b>-25.7</b> | <b>-4.9</b>   |
| 32c | 52.13        | 42.80        | 44.58        | <b>19.8</b>  | <b>0.8</b>   | <b>0.2</b>    |
| 32d | 69.29        | 50.94        | 54.02        | <b>92.9</b>  | <b>55.7</b>  | <b>39.0</b>   |
| 32e | 51.56        | 64.26        | 28.51        | <b>78.6</b>  | <b>75.6</b>  | <b>44.5</b>   |
| 32f | -13.98       | 9.74         | 4.26         | <b>70.9</b>  | <b>63.5</b>  | <b>78.3</b>   |
| 32g | 16.38        | 15.94        | -9.45        | <b>39.4</b>  | <b>39.9</b>  | <b>40.4</b>   |
| 33a | -1.13        | -9.10        | -6.31        | <b>99.7</b>  | <b>-79.8</b> | <b>-110.6</b> |
| 33b | -4.92        | -4.73        | 5.25         | <b>21.6</b>  | <b>29.4</b>  | <b>-30.6</b>  |
| 33c | -4.71        | 6.99         | -3.79        | <b>-35.1</b> | <b>-29.7</b> | <b>-24.8</b>  |
| 33d | 9.03         | 8.57         | -2.64        | <b>-16.5</b> | <b>15.5</b>  | <b>8.7</b>    |
| 34a | -11.72       | 14.47        | 22.40        | <b>27.4</b>  | <b>24.3</b>  | <b>11.3</b>   |
| 34b | 39.25        | -8.13        | -2.94        | <b>35.7</b>  | <b>29.1</b>  | <b>-8.4</b>   |
| 34c | 34.23        | 0.79         | 4.67         | <b>47.8</b>  | <b>50.4</b>  | <b>36.2</b>   |
| 35a | 26.96        | 2.95         | 24.69        | <b>98.9</b>  | <b>100.2</b> | <b>99.7</b>   |
| 35c | 22.69        | 39.03        | 9.01         | <b>1.6</b>   | <b>13.7</b>  | <b>14.9</b>   |
| 36a | -16.41       | 3.58         | -16.76       | <b>15.6</b>  | <b>3.4</b>   | <b>27.5</b>   |
| 36b | -20.73       | -0.21        | -4.59        | <b>6.6</b>   | <b>-12.5</b> | <b>34.3</b>   |
| 37a | 35.28        | 35.98        | -0.42        | <b>2.8</b>   | <b>-18.1</b> | <b>-1.4</b>   |
| 38a | -3.47        | 0.37         | 21.72        | <b>54.7</b>  | <b>12.5</b>  | <b>11.3</b>   |

**Table no S1.** Antimycobacterial activity data for various thienopyrimidinones

| Code       | Active <i>M. tuberculosis</i> H37 Ra |                  | Dormant <i>M. tuberculosis</i> H37 Ra |                  | Active <i>M. bovis</i> BCG |                  | Dormant <i>M. bovis</i> BCG |                  |
|------------|--------------------------------------|------------------|---------------------------------------|------------------|----------------------------|------------------|-----------------------------|------------------|
|            | MIC                                  | IC <sub>50</sub> | MIC                                   | IC <sub>50</sub> | MIC                        | IC <sub>50</sub> | MIC                         | IC <sub>50</sub> |
|            | (µg/mL)                              | (µg/mL)          | (µg/mL)                               | (µg/mL)          | (µg/mL)                    | (µg/mL)          | (µg/mL)                     | (µg/mL)          |
| <b>11g</b> | 44.13                                | 3.40             | 43.76                                 | 3.46             | 10.09                      | 2.71             | 20.76                       | 12.86            |
| <b>11m</b> | 42.89                                | 24.61            | 36.32                                 | 12.78            | 8.51                       | 3.04             | 9.82                        | 1.76             |
| <b>13b</b> | <b>2.51</b>                          | <b>1.07</b>      | <b>5.20</b>                           | <b>1.20</b>      | <b>1.89</b>                | <b>1.06</b>      | <b>3.02</b>                 | <b>1.82</b>      |
| <b>14a</b> | 38.32                                | 11.51            | >50                                   | 15.27            | 4.95                       | 1.77             | 8.07                        | 3.15             |
| <b>14b</b> | 45.86                                | 8.76             | 42.70                                 | 4.51             | 1.37                       | 0.71             | 2.34                        | 1.26             |

|            |             |             |             |             |             |             |             |             |
|------------|-------------|-------------|-------------|-------------|-------------|-------------|-------------|-------------|
| <b>14c</b> | 49.31       | 8.07        | 49.13       | 9.11        | 1.52        | 0.76        | 2.01        | 1.10        |
| <b>24g</b> | 24.58       | 12.84       | 35.21       | 7.20        | 2.29        | 1.58        | 3.35        | 1.52        |
| <b>24h</b> | 3.50        | 1.90        | 6.31        | 3.40        | 2.42        | 1.32        | 1.40        | 0.85        |
| <b>25d</b> | 17.51       | 8.11        | 18.49       | 8.84        | 6.30        | 3.66        | 9.37        | 5.02        |
| <b>26c</b> | 6.70        | 3.53        | 15.02       | 3.62        | 21.43       | 12.11       | 23.42       | 11.02       |
| <b>29d</b> | 8.42        | 5.06        | 11.54       | 5.24        | 4.08        | 2.46        | 4.51        | 3.17        |
| <b>29e</b> | <b>2.07</b> | <b>0.91</b> | <b>8.33</b> | <b>1.20</b> | <b>1.30</b> | <b>0.69</b> | <b>2.26</b> | <b>1.55</b> |
| <b>RIF</b> | 0.51        | 0.0018      | 0.75        | 0.05        | 0.45        | 0.0054      | 0.81        | 0.075       |

RIF indicate Rifampicin, MIC indicates Minimum Inhibitory Concentration.

#### Primary cytotoxic screening results against human cancer cell lines (% inhibition)

| Comp no | MCF-7 cell line |          |         |  | A549 cell line |          |         |  | HCT 116 cell line |          |         |
|---------|-----------------|----------|---------|--|----------------|----------|---------|--|-------------------|----------|---------|
|         | 30 µg/mL        | 10 µg/mL | 3 µg/mL |  | 30 µg/mL       | 10 µg/mL | 3 µg/mL |  | 30 µg/mL          | 10 µg/mL | 3 µg/mL |
| 11a     | 33.39           | -0.11    | 12.73   |  | 21.80          | 16.40    | 6.25    |  | 28.04             | 23.09    | 12.82   |
| 11b     | 30.73           | 16.84    | -10.09  |  | 18.89          | 19.73    | 13.49   |  | 48.21             | 36.96    | 22.21   |
| 11c     | 33.09           | 0.92     | 0.00    |  | 17.87          | 23.61    | 5.09    |  | 46.63             | 36.11    | 29.58   |
| 11d     | 1.35            | -3.06    | -6.00   |  | 6.13           | 6.85     | -7.30   |  | 8.63              | 5.77     | -5.94   |
| 11e     | 10.51           | 6.02     | -7.15   |  | 10.25          | 0.00     | 6.16    |  | 41.22             | 24.03    | 16.93   |
| 11f     | -3.02           | -10.70   | -5.84   |  | 0.00           | -10.04   | -5.25   |  | 0.00              | 0.00     | 0.00    |
| 11g     | 33.60           | 17.95    | 9.33    |  | 30.78          | 18.15    | 19.81   |  | 14.16             | 12.74    | 2.00    |
| 11h     | 24.66           | 25.80    | 19.62   |  | 21.37          | 20.04    | 20.97   |  | 8.04              | 22.16    | 3.00    |
| 11i     | 33.77           | 32.06    | 17.56   |  | -5.13          | 0.00     | -19.77  |  | -6.84             | -2.72    | -1.73   |
| 11j     | 40.86           | 12.22    | 1.25    |  | 30.74          | 23.39    | 28.15   |  | 33.54             | 29.89    | 31.97   |
| 11k     | 18.36           | -11.15   | -0.12   |  | 44.44          | 34.20    | 39.01   |  | 22.24             | 5.59     | 18.82   |
| 11m     | 34.65           | -6.01    | 6.47    |  | 56.61          | 25.24    | 26.29   |  | 26.41             | 23.20    | 22.13   |
| 12a     | 30.28           | -1.30    | 1.47    |  | 0.16           | 9.63     | -2.56   |  | 13.19             | 9.33     | 18.32   |
| 12b     | 0.00            | 0.97     | 8.30    |  | 3.62           | -1.63    | 10.38   |  | 0.00              | -12.18   | 7.13    |
| 12c     | 0.00            | 0.00     | 0.00    |  | 12.05          | 0.00     | 0.00    |  | 11.33             | 27.27    | 1.00    |
| 12d     | 23.20           | 19.26    | 9.89    |  | -23.30         | 0.00     | 0.00    |  | 39.64             | 30.51    | 13.51   |
| 12e     | 26.90           | 5.05     | 0.00    |  | -12.81         | 0.00     | 0.00    |  | 36.03             | 9.25     | 11.67   |
| 13a     | 58.25           | 42.35    | 35.97   |  | 63.14          | 35.14    | 33.66   |  | 54.06             | 50.01    | 40.00   |
| 13b     | 24.49           | 21.50    | 10.92   |  | 39.49          | 0.00     | -21.16  |  | 38.96             | 13.41    | 11.70   |
| 14a     | -1.16           | 3.52     | -7.11   |  | 9.71           | 14.64    | 13.20   |  | 11.47             | 3.75     | 1.66    |
| 14b     | 62.88           | 23.58    | 0.00    |  | 18.05          | 0.00     | 4.75    |  | 53.09             | 28.83    | 27.91   |
| 14c     | 8.89            | 8.22     | -0.21   |  | 10.22          | 0.00     | 12.85   |  | -1.38             | -8.96    | 0.00    |
| 15a     | 51.08           | 33.08    | 32.51   |  | 11.04          | 9.39     | 3.58    |  | -10.50            | -5.80    | 18.73   |

|     |        |        |        |  |        |        |        |  |        |       |       |
|-----|--------|--------|--------|--|--------|--------|--------|--|--------|-------|-------|
| 17a | -8.86  | 0.00   | -9.39  |  | -17.95 | 0.00   | 0.00   |  | 8.81   | -3.42 | 3.00  |
| 18a | 0.00   | -0.53  | 0.00   |  | -0.35  | -14.97 | 6.91   |  | -6.07  | 0.00  | 3.40  |
| 19a | 30.93  | 25.42  | 0.00   |  | -12.91 | 6.91   | -6.20  |  | 16.24  | 31.66 | 30.19 |
| 19b | 25.62  | 8.14   | 5.40   |  | -2.01  | 1.28   | 10.02  |  | 44.47  | 24.85 | 22.42 |
| 20b | -2.68  | 12.19  | -1.75  |  | 13.08  | 11.28  | 14.73  |  | -12.00 | -9.17 | 2.23  |
| 20c | 30.70  | 26.93  | 24.98  |  | 20.24  | 12.82  | 13.94  |  | 31.80  | 39.47 | 3.00  |
| 22a | 18.55  | 8.41   | 21.41  |  | -6.13  | 0.00   | -6.50  |  | -5.61  | 7.26  | 12.87 |
| 24a | 31.57  | 3.10   | 9.90   |  | 19.26  | 18.08  | 9.72   |  | 38.79  | 28.70 | 22.04 |
| 24b | -9.00  | 12.77  | 7.34   |  | -4.16  | -3.06  | -3.00  |  | 9.28   | 30.00 | 34.30 |
| 24c | -4.57  | -14.99 | 5.86   |  | 10.03  | 9.62   | 5.15   |  | 21.48  | 16.64 | 5.42  |
| 24d | -2.26  | -12.13 | 0.00   |  | 22.12  | 20.04  | 13.31  |  | 27.92  | 24.81 | 10.00 |
| 24e | 6.80   | -18.85 | -8.21  |  | 0.00   | -4.96  | -17.22 |  | 47.99  | 41.42 | 34.71 |
| 24f | 29.11  | 0.00   | -10.15 |  | -6.07  | 0.00   | 0.00   |  | 50.27  | 17.72 | 22.82 |
| 24g | 53.37  | -9.35  | -12.05 |  | -13.66 | 2.01   | -6.56  |  | 0.00   | 0.00  | 2.00  |
| 24h | 60.98  | -3.24  | 9.73   |  | 34.07  | 0.07   | 0.00   |  | 86.90  | 17.14 | 11.02 |
| 24i | -7.03  | 4.46   | -4.78  |  | 24.03  | 20.36  | 9.89   |  | 0.00   | 0.00  | -5.14 |
| 24j | -2.42  | -4.26  | -5.69  |  | 26.91  | 16.50  | 17.96  |  | -8.19  | 0.00  | -6.38 |
| 25a | 47.77  | 0.45   | -16.58 |  | 3.75   | 0.67   | 0.00   |  | 11.55  | -3.39 | 0.00  |
| 25b | 13.63  | 4.38   | -10.28 |  | 7.18   | -9.14  | 0.00   |  | 36.25  | 31.12 | 35.85 |
| 25c | -10.04 | 0.00   | -5.88  |  | 43.77  | 13.24  | 6.01   |  | 45.82  | 21.33 | 1.46  |
| 25d | 50.74  | 17.81  | 14.67  |  | 16.44  | -10.40 | 1.92   |  | 28.59  | 27.10 | 16.17 |
| 25e | 0.00   | 0.00   | 0.00   |  | 0.25   | 1.13   | -4.77  |  | 18.23  | 0.00  | 1.35  |
| 26a | 37.16  | 32.64  | 28.26  |  | 29.30  | 23.65  | 24.33  |  | 50.84  | 48.15 | 32.00 |
| 26b | 10.26  | 0.00   | -16.85 |  | -15.68 | -45.62 | -3.82  |  | 15.77  | 24.01 | 0.00  |
| 26c | 3.79   | 0.00   | 0.00   |  | 17.15  | 7.21   | 14.62  |  | 21.68  | 20.95 | 3.00  |
| 26d | 35.01  | 20.76  | 17.45  |  | 33.57  | 20.23  | 16.03  |  | 30.44  | 25.00 | 5.00  |
| 29a | 26.21  | 20.16  | 8.32   |  | 22.92  | 14.52  | 15.83  |  | 28.69  | 36.51 | 1.00  |
| 29b | 8.91   | -10.80 | 2.38   |  | -0.72  | 4.92   | 3.08   |  | 12.58  | -2.62 | -7.88 |
| 29d | 42.77  | 32.57  | 19.39  |  | 81.88  | 10.34  | 8.11   |  | 58.07  | 41.28 | 39.41 |
| 29e | -5.28  | 3.99   | -2.73  |  | -11.89 | -7.34  | -5.22  |  | 47.38  | 18.69 | 0.87  |
| 30a | 24.17  | 7.01   | 20.09  |  | -11.42 | 0.00   | 28.02  |  | 40.57  | 27.77 | 26.15 |
| 30b | 11.25  | 6.57   | 0.00   |  | -17.29 | 0.00   | 0.00   |  | 41.27  | 32.94 | 24.00 |
| 30c | 19.34  | 19.27  | 15.80  |  | -11.62 | 0.00   | -9.58  |  | 3.89   | -0.44 | -2.72 |
| 30d | 0.00   | 0.00   | 0.00   |  | 3.70   | -9.44  | -8.18  |  | 3.80   | 0.00  | 0.00  |
| 31a | 34.89  | -0.94  | 0.00   |  | 30.34  | 20.33  | 10.71  |  | 31.99  | 17.58 | 6.35  |
| 31b | 17.61  | -8.13  | 1.71   |  | 36.77  | 23.95  | 15.68  |  | 13.94  | 13.30 | 12.62 |
| 32a | 14.68  | 2.15   | 9.81   |  | 30.25  | 31.60  | 27.72  |  | 11.06  | -0.46 | 9.95  |
| 32b | 0.00   | 0.00   | 13.31  |  | 14.73  | 14.24  | -3.78  |  | 0.00   | -7.07 | 23.35 |
| 32c | -9.05  | -1.35  | -6.85  |  | 17.91  | 11.25  | 12.00  |  | 27.81  | 28.08 | 12.00 |
| 32d | 10.23  | 6.12   | 5.32   |  | 9.19   | 0.00   | -11.50 |  | 15.24  | 15.65 | 2.00  |
| 32e | 46.86  | 16.84  | 36.21  |  | 19.52  | -2.88  | 1.36   |  | 40.31  | 27.51 | 39.04 |
| 32f | 0.00   | 0.00   | -8.54  |  | 7.08   | -2.54  | -9.63  |  | 0.00   | 0.05  | -8.22 |
| 32g | 12.19  | -0.25  | -4.08  |  | -17.61 | -0.19  | 5.21   |  | 31.59  | 0.00  | 0.00  |
| 33a | 0.00   | 0.00   | 0.00   |  | 5.71   | -7.06  | -8.08  |  | 4.10   | -6.69 | -6.37 |
| 33b | 0.00   | 0.00   | 0.00   |  | 28.39  | 8.79   | 8.76   |  | 1.88   | -2.82 | 0.00  |
| 33c | 0.00   | -4.09  | 0.00   |  | 28.24  | 11.80  | 4.28   |  | 17.28  | 9.17  | 14.89 |
| 33d | 0.00   | -9.10  | 0.00   |  | 33.11  | 29.71  | 30.89  |  | 23.61  | 11.64 | 13.27 |
| 34a | 35.51  | 30.84  | -1.58  |  | -6.20  | 3.43   | 5.65   |  | 62.04  | 48.09 | 34.72 |
| 34b | -3.22  | 0.00   | 0.00   |  | -5.34  | 0.00   | 0.00   |  | 26.92  | 29.22 | 12.00 |
| 34c | -1.88  | 0.00   | 0.00   |  | 10.63  | 0.00   | 0.00   |  | 4.30   | 0.40  | 3.00  |

|     |       |       |       |  |        |        |        |  |        |       |        |
|-----|-------|-------|-------|--|--------|--------|--------|--|--------|-------|--------|
| 35a | 26.98 | 5.67  | 2.40  |  | -54.27 | -17.37 | -10.21 |  | 37.87  | 31.80 | 2.54   |
| 35c | 1.76  | 1.30  | 0.00  |  | 33.78  | 26.72  | 32.23  |  | -13.30 | 0.00  | -8.11  |
| 36a | 7.33  | 0.00  | 0.00  |  | -4.41  | -6.12  | -5.44  |  | 27.55  | 21.60 | 0.00   |
| 36b | 21.72 | -6.20 | -7.62 |  | 16.79  | 13.68  | 1.02   |  | 36.96  | 32.40 | 15.00  |
| 37a | 0.00  | 0.00  | 0.00  |  | 11.18  | 5.83   | 0.73   |  | 0.00   | -4.74 | -12.62 |
| 38a | 18.49 | 10.66 | 8.98  |  | -10.98 | -5.45  | 4.30   |  | 41.06  | 17.81 | -4.91  |

**Table No S2. Cytotoxicity profile of selected compounds against human cancer cell lines**

| Code                                                                                                                                                                                                            | In vitro cytotoxicity of selected thienopyrimidinones derivatives |                             |                             |                             |                             |                             |                             |                             |
|-----------------------------------------------------------------------------------------------------------------------------------------------------------------------------------------------------------------|-------------------------------------------------------------------|-----------------------------|-----------------------------|-----------------------------|-----------------------------|-----------------------------|-----------------------------|-----------------------------|
|                                                                                                                                                                                                                 | MCF-7                                                             |                             | A549                        |                             | HCT 116                     |                             | THP-1                       |                             |
|                                                                                                                                                                                                                 | GI <sub>50</sub><br>(µg/mL)                                       | GI <sub>90</sub><br>(µg/mL) | GI <sub>50</sub><br>(µg/mL) | GI <sub>90</sub><br>(µg/mL) | GI <sub>50</sub><br>(µg/mL) | GI <sub>90</sub><br>(µg/mL) | GI <sub>50</sub><br>(µg/mL) | GI <sub>90</sub><br>(µg/mL) |
| <b>11g</b>                                                                                                                                                                                                      | >100                                                              | >100                        | >100                        | >100                        | >100                        | >100                        | >100                        | >100                        |
| <b>11m</b>                                                                                                                                                                                                      | 33.8                                                              | >100                        | 27.36                       | 95.97                       | >100                        | >100                        | >100                        | >100                        |
| <b>13b</b>                                                                                                                                                                                                      | >100                                                              | >100                        | >100                        | >100                        | >100                        | >100                        | >100                        | >100                        |
| <b>14a</b>                                                                                                                                                                                                      | >100                                                              | >100                        | >100                        | >100                        | >100                        | >100                        | >100                        | >100                        |
| <b>14b</b>                                                                                                                                                                                                      | 24.83                                                             | >100                        | >100                        | >100                        | 17.64                       | >100                        | >100                        | >100                        |
| <b>14c</b>                                                                                                                                                                                                      | >100                                                              | >100                        | >100                        | >100                        | >100                        | >100                        | >100                        | >100                        |
| <b>24g</b>                                                                                                                                                                                                      | 20.52                                                             | >100                        | 35.08                       | >100                        | >100                        | >100                        | >100                        | >100                        |
| <b>24h</b>                                                                                                                                                                                                      | 26.12                                                             | >100                        | 45.44                       | >100                        | 42.41                       | >100                        | >100                        | >100                        |
| <b>25d</b>                                                                                                                                                                                                      | 19.68                                                             | >100                        | 34.15                       | >100                        | >100                        | >100                        | >100                        | >100                        |
| <b>26c</b>                                                                                                                                                                                                      | >100                                                              | >100                        | >100                        | >100                        | >100                        | >100                        | >100                        | >100                        |
| <b>29d</b>                                                                                                                                                                                                      | 100                                                               | >100                        | 16.17                       | 74.66                       | 14.7                        | 85.56                       | >100                        | >100                        |
| <b>29e</b>                                                                                                                                                                                                      | >100                                                              | >100                        | >100                        | >100                        | >100                        | >100                        | >100                        | >100                        |
| <b>Rifampicin</b>                                                                                                                                                                                               | >100                                                              | >100                        | >100                        | >100                        | >100                        | >100                        | >100                        | >100                        |
| <b>Paclitaxel</b>                                                                                                                                                                                               | 0.0048                                                            | 0.075                       | 0.0035                      | 0.0706                      | 0.026                       | 5.21                        | 0.1374                      | 5.8140                      |
| <b>GI<sub>90</sub></b> indicates the minimum concentration of compound required to inhibit the maximum (90%) growth of cells and <b>GI<sub>50</sub></b> indicates concentration to inhibit 50% growth of cells. |                                                                   |                             |                             |                             |                             |                             |                             |                             |

**Table No S3. Selectivity index (SI) of selected thienopyrimidinones derivatives on human cell lines against *Mycobacterium tuberculosis* H37Ra and *M. bovis* BCG.**

| Code       | SI on MCF-7   |    |             |    | SI on A549    |    |             |    | SI on HCT 116 |    |             |    | SI on THP-1   |    |             |    |
|------------|---------------|----|-------------|----|---------------|----|-------------|----|---------------|----|-------------|----|---------------|----|-------------|----|
|            | Against H37Ra |    | Against BCG |    | Against H37Ra |    | Against BCG |    | Against H37Ra |    | Against BCG |    | Against H37Ra |    | Against BCG |    |
|            | A             | D  | A           | D  | A             | D  | A           | D  | A             | D  | A           | D  | A             | D  | A           | D  |
| <b>11g</b> | 2             | 2  | 10          | 5  | 2             | 2  | 10          | 5  | 2             | 2  | 10          | 5  | 2             | 2  | 10          | 5  |
| <b>11m</b> | 1             | 1  | 4           | 3  | 1             | 1  | 3           | 3  | 2             | 3  | 12          | 10 | 2             | 3  | 12          | 10 |
| <b>13b</b> | 40            | 19 | 53          | 33 | 40            | 19 | 53          | 33 | 40            | 19 | 53          | 33 | 40            | 19 | 53          | 33 |
| <b>14a</b> | 3             | 2  | 20          | 12 | 3             | 2  | 20          | 12 | 3             | 2  | 20          | 12 | 3             | 2  | 20          | 12 |

|            |     |     |     |     |     |     |     |     |     |     |     |     |     |     |     |     |
|------------|-----|-----|-----|-----|-----|-----|-----|-----|-----|-----|-----|-----|-----|-----|-----|-----|
| <b>14b</b> | 1   | 1   | 18  | 11  | 2   | 2   | 73  | 43  | 0   | 0   | 13  | 8   | 2   | 2   | 73  | 43  |
| <b>14c</b> | 2   | 2   | 66  | 50  | 2   | 2   | 66  | 50  | 2   | 2   | 66  | 50  | 2   | 2   | 66  | 50  |
| <b>24g</b> | 1   | 1   | 9   | 6   | 1   | 1   | 15  | 10  | 4   | 3   | 44  | 30  | 4   | 3   | 44  | 30  |
| <b>24h</b> | 7   | 4   | 11  | 19  | 13  | 7   | 19  | 32  | 12  | 7   | 18  | 30  | 29  | 16  | 41  | 71  |
| <b>25d</b> | 1   | 1   | 3   | 2   | 2   | 2   | 5   | 4   | 6   | 5   | 16  | 11  | 6   | 5   | 16  | 11  |
| <b>26c</b> | 15  | 7   | 5   | 4   | 15  | 7   | 5   | 4   | 15  | 7   | 5   | 4   | 15  | 7   | 5   | 4   |
| <b>29d</b> | 12  | 9   | 25  | 22  | 2   | 1   | 4   | 4   | 2   | 1   | 4   | 3   | 12  | 9   | 25  | 22  |
| <b>29e</b> | 48  | 12  | 77  | 44  | 48  | 12  | 77  | 44  | 48  | 12  | 77  | 44  | 48  | 12  | 77  | 44  |
| <b>RIF</b> | 196 | 133 | 222 | 123 | 196 | 133 | 222 | 123 | 196 | 133 | 222 | 123 | 196 | 133 | 222 | 123 |

H37Ra- *Mycobacterium tuberculosis* H37Ra; BCG- *M. bovis* BCG; A- Active stage; D- Dormant stage;  
Selectivity Index (SI) is calculated by using formula  $GI_{50}$  of compound against cell line /MIC of compound against H37Ra or BCG. If the SI is  $\geq 10$ , then the compound is investigated further.
